# Supplementary material for: Chromophores and chemical composition of brown carbon characterized at an urban kerbside by excitation–emission spectroscopy and mass spectrometry
Source: Copernicus journal article supplement (doi:10.5194/acp-22-14971-2022), 2022-11-24
Supplement: Supplementary file 1 [file acp-22-14971-2022-supplement.pdf]

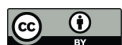

*Supplement of*

## **Chromophores and chemical composition of brown carbon characterized at an urban kerbside by excitation–emission spectroscopy and mass spectrometry**

**Feng Jiang et al.**

*Correspondence to:* Feng Jiang (feng.jiang@kit.edu) and Harald Saathoff (harald.saathoff@kit.edu)

The copyright of individual parts of the supplement might differ from the article licence.

## 1 Nitroaromatic compound calibration

After the field campaign, the calibration of 4-nitrophenol, 4-nitrocatechol, 2-Methyl-4-nitrophenol, and 2-Methyl-4-nitrocatechol was utilized to characterize the sensitivity factor of NACs. Each NACs was dissolved into methanol to about 10 ng/ $\mu$ L as a standard NACs solution. The different volume (1, 2, and 5  $\mu$ L) of the standard NACs solution was deposited on a PTFE filter using an accurate syringe. The deposited filter was heated by FIGAERO-iodide-CIMS carried by ultra-high purity nitrogen following a thermal desorption. The filters were then desorbed in the same way as for the field sampling. Every volume of the standard solution was repeated three times. The average sensitivity factor of 4 NACs was  $1.7 \pm 0.06$  (Fig. S2).

## 2 AMS data analysis

AMS data analysis is performed using standard software written for Igor software (V7.08, WaveMetrics, Portland, OR), including SQUIRREL (version 1.60C) and PIKA (version 1.20). The mean composition-dependent collection efficiency employed was 0.5. In order to investigate the potential source of organic aerosols, positive matrix factorization (PMF) analysis for AMS high-resolution (HR) spectra of organic compounds has been done by using the PMF Evaluation Tool (PET version 3.00D) (Ulbrich et al., 2009). In this study, only mass spectra in the range  $m/z$  12 – 120 obtained with the AMS operated in V model (mass resolution: 2000) were included in the PMF analysis (Song et al., 2022). Large ion masses had a low signal-to-noise ratio. The elemental ratios of organics including oxygen-to-carbon and hydrogen-to-carbon ratios (O/C and H/C) were calculated from the V mode data based on the ‘Improved-Ambient (I-A)’ method (Canagaratna et al., 2015; Song et al., 2022). The detail information of AMS data analysis was shown in our previous study (Song et al., 2022).

## 3 Total potential brown carbon molecules

We observed typically about 2000 mass peaks corresponding to different oxygenated organic compounds in particles by using FIGAERO-CIMS. Individual compounds were assigned to the mass peaks by fitting,  $C_cH_hO_oN_n$ , different numbers of atoms: c carbon, h hydrogen, o oxygen, n nitrogen (Lopez-Hilfiker et al., 2014). A double bond equivalent (DBE) can be calculated as follows (Daumit et al., 2013):

$$DBE = \frac{n - h}{2} + c + 1$$

Lin et al. (2018) assigned potential brown carbon compounds in the plot of DBE vs the number of carbon atoms per molecule. They employed high-resolution mass spectrometry to analyze biomass burning organic aerosol. We used this method to find potential BrC molecules, as shown in Fig. S15. After derive this classification of the potential brown carbon molecules from around 2000 molecules, we can calculate their potential mass concentration and mass fraction by assuming an average sensitivity of the CIMS of 22 cps/ppt (Lopez-Hilfiker et al., 2016) and dividing their mass by the total organic aerosol mass from the AMS.

Modified Aromaticity Index ( $AI_{mod}$ ) equation:

$$AI_{mod} = \frac{1 + C - \frac{1}{2}O - S - \frac{1}{2}(N + H)}{C - \frac{1}{2}O - N}$$

#### 4 Pearson's Correlation of PARAFAC components with the potential BrC molecules

PARAFAC component intensities were normalized to the sum of component fluorescence intensities for a given sample. And the mass concentrations of each potential BrC molecule were normalized to the total mass concentration of the 321 potential BrC molecules for a given sample. Pearson's correlations were derived between each potential BrC molecule and PARAFAC data across 8 samples. Molecules correlated to PARAFAC component intensities with Pearson's  $r \geq 0.621$  (1-sided t-test) were assigned to each PARAFAC component (Table S10).

**Table S1. Instruments were installed in the measurement container.**

| Measured parameter                                                                           | Instrument                            | Data period |                        |
|----------------------------------------------------------------------------------------------|---------------------------------------|-------------|------------------------|
|                                                                                              |                                       | Summer 2019 | Winter 2020            |
| Ambient temperature                                                                          | WS700 (Lufft GmbH)                    | 7-29 July   | 27 February - 26 March |
| Container temperature                                                                        | WS700 (Lufft GmbH)                    | 7-29 July   | 27 February - 26 March |
| Relative humidity                                                                            | WS700 (Lufft GmbH)                    | 7-29 July   | 27 February -26 March  |
| Pressure                                                                                     | WS700 (Lufft GmbH)                    | 7-29 July   | 27 February -26 March  |
| Wind speed                                                                                   | WS700 (Lufft GmbH)                    | 7-29 July   | 27 February - 26 March |
| Wind direction                                                                               | WS700 (Lufft GmbH)                    | 7-29 July   | 27 February - 26 March |
| Precipitation                                                                                | WS700 (Lufft GmbH)                    | 7-29 July   | 27 February - 26 March |
| Global radiation                                                                             | WS700 (Lufft GmbH)                    | 7-29 July   | 27 February - 26 March |
| O <sub>3</sub>                                                                               | O341M (Environment SA)                | 7-29 July   | 27 February - 26 March |
| NO <sub>2</sub>                                                                              | AS32M (Environment SA)                | 7-29 July   | 27 February - 26 March |
| Particle optical diameter (0.18-18 µm)                                                       | OPC FIDAS200 (Palas GmbH)             | 7-29 July   | 27 February - 26 March |
| Black carbon (BC)                                                                            | AE51 Aethalometer (Aethlabs Inc.)     | 7-29 July   | 27 February - 26 March |
| Black carbon (BC)                                                                            | MA200 Aethalometer (Aethlabs Inc.)    | -           | 27 February - 26 March |
| Particle compounds                                                                           | AMS (Aerodyne Research Inc.)          | 7-29 July   | 27 February - 26 March |
| Light absorption and emission excitation spectroscopy (offline analysis of filters extracts) | Aqualog (Horiba Inc.)                 | 7-29 July   | 27 February - 26 March |
| Particle-phase oxygenate organic molecules (offline analysis of filters)                     | FIGAERO-CIMS (Aerodyne Research Inc.) | 7-29 July   | 27 February - 26 March |

60

**Table S2. Instruments installed on top of a physic building at KIT (~65 m above ground level)**

| Measured parameter | Instrument        | Data period |                      |
|--------------------|-------------------|-------------|----------------------|
|                    |                   | Summer2019  | Winter 2020          |
| Wind speed         | WS700 (LufftGmbH) | 7-29 July   | 27 February-26 March |
| Wind direction     | WS700 (LufftGmbH) | 7-29 July   | 27 February-26 March |

**Table S3. A list of Teflon filters sampled for FIGAERO-CIMS analysis at Durlacher Tor, Karlsruhe**

| <b>Filter No.</b> | <b>Starting time</b> | <b>Ending time</b> | <b>Duration (min)</b> | <b>Sampling flow (L min<sup>-1</sup>)</b> | <b>Volume (L)</b> | <b>Time</b> |
|-------------------|----------------------|--------------------|-----------------------|-------------------------------------------|-------------------|-------------|
| 1                 | 03/17/2020 08:35     | 03/17/2020 10:35   | 120                   | 5.2                                       | 624               | Morning     |
| 2                 | 03/17/2020 10:42     | 03/17/2020 14:14   | 212                   | 5.2                                       | 1102              | Afternoon   |
| 3                 | 03/17/2020 20:59     | 03/17/2020 22:50   | 111                   | 5.2                                       | 577               | Night       |
| 4                 | 03/18/2020 08:50     | 03/18/2020 11:20   | 150                   | 5.2                                       | 780               | Morning     |
| 5                 | 03/18/2020 12:36     | 03/18/2020 16:30   | 234                   | 5.2                                       | 1217              | Afternoon   |
| 6                 | 03/18/2020 21:35     | 03/18/2020 23:10   | 95                    | 5.2                                       | 494               | Night       |
| 7                 | 03/19/2020 08:40     | 03/19/2020 11:20   | 160                   | 5.2                                       | 832               | Morning     |
| 8                 | 03/19/2020 11:30     | 03/19/2020 16:05   | 275                   | 5.2                                       | 1430              | Afternoon   |
| 9                 | 03/19/2020 20:00     | 03/19/2020 22:04   | 124                   | 5.2                                       | 645               | Night       |
| 10                | 03/20/2020 09:05     | 03/20/2020 11:30   | 145                   | 5.2                                       | 754               | Morning     |
| 11                | 03/20/2020 12:00     | 03/20/2020 14:20   | 140                   | 5.2                                       | 728               | Afternoon   |

**Table S4. A list of quartz filters sampled for Aqualog analysis at Durlacher Tor, Karlsruhe**

| Sample IDs.        | Starting time    | Ending time      | Duration(h) | Sampling flow (m <sup>3</sup> h <sup>-1</sup> ) | Volume (m <sup>3</sup> ) | Times     |
|--------------------|------------------|------------------|-------------|-------------------------------------------------|--------------------------|-----------|
| <b>2019 Summer</b> |                  |                  |             |                                                 |                          |           |
| 1                  | 07/07/2019 12:30 | 07/08/2019 12:00 | 23.5        | 2.3                                             | 54                       | One day   |
| 2                  | 07/08/2019 12:30 | 07/09/2019 12:00 | 23.5        | 2.3                                             | 54                       | One day   |
| 3                  | 07/10/2019 12:30 | 07/11/2019 12:00 | 23.5        | 2.3                                             | 54                       | One day   |
| 4                  | 07/12/2019 12:30 | 07/13/2019 12:00 | 23.5        | 2.3                                             | 54                       | One day   |
| 5                  | 07/14/2019 12:30 | 07/15/2019 12:00 | 23.5        | 2.3                                             | 54                       | One day   |
| 6                  | 07/15/2019 12:30 | 07/16/2019 12:00 | 23.5        | 2.3                                             | 54                       | One day   |
| 7                  | 07/16/2019 12:30 | 07/17/2019 12:00 | 23.5        | 2.3                                             | 54                       | One day   |
| 8                  | 07/17/2019 12:30 | 07/18/2019 12:00 | 23.5        | 2.3                                             | 54                       | One day   |
| 9                  | 07/18/2019 12:30 | 07/19/2019 12:00 | 23.5        | 2.3                                             | 54                       | One day   |
| 10                 | 07/19/2019 12:30 | 07/20/2019 12:00 | 23.5        | 2.3                                             | 54                       | One day   |
| 11                 | 07/20/2019 12:30 | 07/21/2019 12:00 | 23.5        | 2.3                                             | 54                       | One day   |
| 12                 | 07/21/2019 12:30 | 07/22/2019 12:00 | 23.5        | 2.3                                             | 54                       | One day   |
| 13                 | 07/23/2019 12:30 | 07/24/2019 12:00 | 23.5        | 2.3                                             | 54                       | One day   |
| <b>2020 Winter</b> |                  |                  |             |                                                 |                          |           |
| 14                 | 02/27/2020 09:30 | 02/28/2020 09:00 | 23.5        | 2.3                                             | 54                       | One day   |
| 15                 | 02/28/2020 09:30 | 02/29/2020 09:00 | 23.5        | 2.3                                             | 54                       | One day   |
| 16                 | 02/29/2020 09:30 | 03/01/2020 09:00 | 23.5        | 2.3                                             | 54                       | One day   |
| 17                 | 03/01/2020 09:30 | 03/02/2020 09:00 | 23.5        | 2.3                                             | 54                       | One day   |
| 18                 | 03/02/2020 09:30 | 03/03/2020 09:00 | 23.5        | 2.3                                             | 54                       | One day   |
| 19                 | 03/03/2020 09:30 | 03/04/2020 09:00 | 23.5        | 2.3                                             | 54                       | One day   |
| 20                 | 03/04/2020 09:30 | 03/05/2020 09:00 | 23.5        | 2.3                                             | 54                       | One day   |
| 21                 | 03/05/2020 09:30 | 03/06/2020 09:00 | 23.5        | 2.3                                             | 54                       | One day   |
| 22                 | 03/06/2020 09:30 | 03/07/2020 09:00 | 23.5        | 2.3                                             | 54                       | One day   |
| 23                 | 03/07/2020 09:30 | 03/08/2020 09:00 | 23.5        | 2.3                                             | 54                       | One day   |
| 24                 | 03/09/2020 09:30 | 03/10/2020 09:00 | 23.5        | 2.3                                             | 54                       | One day   |
| 25                 | 03/10/2020 09:30 | 03/11/2020 09:00 | 23.5        | 2.3                                             | 54                       | One day   |
| 26                 | 03/11/2020 09:30 | 03/12/2020 09:00 | 23.5        | 2.3                                             | 54                       | One day   |
| 27                 | 03/12/2020 09:30 | 03/13/2020 09:00 | 23.5        | 2.3                                             | 54                       | One day   |
| 28                 | 03/13/2020 09:30 | 03/14/2020 09:00 | 23.5        | 2.3                                             | 54                       | One day   |
| 29                 | 03/14/2020 09:30 | 03/15/2020 09:00 | 23.5        | 2.3                                             | 54                       | One day   |
| 30                 | 03/15/2020 09:30 | 03/16/2020 09:00 | 23.5        | 2.3                                             | 54                       | One day   |
| 31                 | 03/16/2020 09:30 | 03/17/2020 09:00 | 23.5        | 2.3                                             | 54                       | One day   |
| 32                 | 03/17/2020 09:30 | 03/18/2020 09:00 | 23.5        | 2.3                                             | 54                       | One day   |
| 33                 | 03/18/2020 09:30 | 03/18/2020 12:10 | 2.7         | 2.3                                             | 6                        | Morning   |
| 34                 | 03/18/2020 12:12 | 03/18/2020 18:25 | 6.2         | 2.3                                             | 14                       | Afternoon |
| 35                 | 03/18/2020 18:30 | 03/19/2020 08:42 | 14.1        | 2.3                                             | 60                       | Night     |
| 36                 | 03/19/2020 08:45 | 03/19/2020 11:33 | 2.8         | 2.3                                             | 6                        | Morning   |
| 37                 | 03/19/2020 11:33 | 03/19/2020 19:40 | 8.1         | 2.3                                             | 19                       | Afternoon |
| 38                 | 03/19/2020 19:43 | 03/20/2020 09:05 | 13.4        | 2.3                                             | 31                       | Night     |

|    |                  |                  |      |     |    |           |
|----|------------------|------------------|------|-----|----|-----------|
| 39 | 03/20/2020 09:10 | 03/20/2020 12:00 | 2.8  | 2.3 | 7  | Morning   |
| 40 | 03/20/2020 12:03 | 03/20/2020 18:22 | 6.3  | 2.3 | 15 | Afternoon |
| 41 | 03/20/2020 18:30 | 03/21/2020 09:00 | 14.5 | 2.3 | 33 | Night     |
| 42 | 03/21/2020 09:30 | 03/22/2020 09:00 | 23.5 | 2.3 | 54 | One day   |
| 43 | 03/22/2020 09:30 | 03/23/2020 09:00 | 23.5 | 2.3 | 54 | One day   |
| 44 | 03/23/2020 09:30 | 03/24/2020 09:00 | 23.5 | 2.3 | 54 | One day   |
| 45 | 03/24/2020 09:30 | 03/25/2020 09:00 | 23.5 | 2.3 | 54 | One day   |
| 46 | 03/25/2020 09:30 | 03/26/2020 09:00 | 23.5 | 2.3 | 54 | One day   |
| 47 | 03/26/2020 09:30 | 03/27/2020 09:00 | 23.5 | 2.3 | 54 | One day   |

---

70 **Table S5. Results of the PARAFAC model**

| Parameters | Fitting of observed concentrations and predicted concentrations | Split-half analysis |
|------------|-----------------------------------------------------------------|---------------------|
| Values     | 0.98                                                            | 0.98                |

The fitting of observed concentrations and predicted concentrations was 0.98. It indicates that the predicted concentrations by 4 components can well explain the observed concentrations. The split-half analysis was 0.98. It indicates that the split-half analysis was well done.



75 **Table S6. Comparison of aerosol particle light absorption, mass absorption efficiency, and absorption Ångström exponent observed in Karlsruhe with other studies.**

| Sampling sites                  | Seasons | Abs <sub>365</sub> (Mm <sup>-1</sup> ) | MAE <sub>365</sub> (m <sup>2</sup> g <sup>-1</sup> ) | AAE <sub>300-450</sub> | Remarks                                                                           | References             |
|---------------------------------|---------|----------------------------------------|------------------------------------------------------|------------------------|-----------------------------------------------------------------------------------|------------------------|
| Melpitz (rural)*, Germany       | Summer  | 1.2 ± 0.3                              | 0.3 ± 0.05                                           | -                      |                                                                                   | (Teich et al., 2017)   |
| Melpitz (rural)*, Germany       | Winter  | 6.6 ± 3.5                              | 1.4 ± 0.5                                            | -                      | The Abs and MAE of BrC at 370 nm; the AAE of BrC in Athen at 470 – 950 nm         | (Teich et al., 2017)   |
| Leipzig (urban)*, Germany       | Winter  | 6.8 ± 3.9                              | 1.5 ± 0.3                                            | -                      |                                                                                   | (Teich et al., 2017)   |
| Waldstein (forest)*, Germany    | Summer  | 0.9 ± 0.1                              | 0.3 ± 0.03                                           | -                      |                                                                                   | (Teich et al., 2017)   |
| Magadino (rural)**, Switzerland | Winter  | 5.6 ± 3.7                              | 0.9                                                  | 3.8                    | The Abs and MAE of BrC at 365 nm; the AAE of BrC at 300 – 400 nm                  | (Moschos et al., 2018) |
| Zurich (urban)**, Switzerland   | Summer  | 1.0 ± 0.7                              | 0.3                                                  | 5.1                    |                                                                                   | (Moschos et al., 2018) |
| Zurich (urban)**, Switzerland   | Winter  | 2.2 ± 1.6                              | 0.9                                                  | 4.5                    |                                                                                   | (Moschos et al., 2018) |
| Karlsruhe (urban), Germany      | Autumn  | -                                      | 12.9 ± 2.8                                           | 2.6 ± 0.8              | The MAE of refractory black carbon (rBC) at 445 nm; the AAE of rBC at 445 – 532nm | (Linke et al., 2016)   |
| Karlsruhe# (urban), Germany     | Summer  | 1.6 ± 0.5                              | 0.5 ± 0.2                                            | 5.6 ± 1.5              | The Abs and MAE of BrC at 365 nm; the AAE of BrC at 300-400 nm                    | This study             |
| Karlsruhe# (urban), Germany     | Winter  | 2.8 ± 1.9                              | 1.1 ± 0.3                                            | 4.7 ± 0.4              |                                                                                   | This study             |

\*: alkaline solvent extraction; \*\*: water extraction; #: methanol extraction

**Table S7. Spectral characteristics of the four PARAFAC components identified in the EEM datasets of methanol extracts from aerosol particles collected during summer and winter**

| PARAFAC component | Excitation wavelength (nm) | Emission wavelength (nm) | Component characteristics from this study | Associated AMS-PMF factors        | Associated molecular characteristics (winter)                                       | Similar component characteristics from references                                                                                            |
|-------------------|----------------------------|--------------------------|-------------------------------------------|-----------------------------------|-------------------------------------------------------------------------------------|----------------------------------------------------------------------------------------------------------------------------------------------|
| C1                | < 240                      | 363                      | Less-oxygenated HULIS                     | BBOA                              | High nitrogen-containing molecules, high molecular weight, and low oxidation status | Humic-like component and less oxygenated species. (Chen et al., 2016)<br>Enriched in biomass burning aerosols (Tang et al., 2020)            |
| C2                | 248, 362                   | 469                      | Highly oxygenated HULIS-1                 | LVOOA1 (summer)                   | Low nitrogen-containing molecules, low molecular weight, and high oxidation status  | Highly oxygenated species and humic-like substance (Chen et al., 2016)<br>An intermediate contribution in urban aerosol (Matos et al., 2015) |
| C3                | < 240, 323                 | 408                      | Highly oxygenated HULIS-2                 | LVOOA2 (summer)<br>LVOOA (winter) | Low nitrogen-containing molecules, low molecular weight, and high oxidation status  | Highly oxygenated species and humic-like substance (Chen et al., 2016)<br>The highest contribution in urban aerosol (Matos et al., 2015)     |
| C4                | 266                        | 307                      | Phenol- and naphthalene-like substances   | SV-OOA and LV-OOA (winter)        | High nitrogen-containing molecules, low molecular weight, and low oxidation status  | Protein-like and non-N-containing species. (Chen et al., 2016)<br>More intense in vehicle exhaust particles. (Tang et al., 2020)             |

80 **Table S8. Assignment of 316 potential brown carbon molecules detected in Karlsruhe, including mass, formula, double bond equivalent (DBE), the ratio of O/C, and correlation coefficients between mass concentration and the absorption of BrC at 365 nm in 8 filter samples. Please note that each sample contained most of the potential BrC molecules.**

| Number | Mass (g mol <sup>-1</sup> ) | Formula     | O/C | H/C | DBE | Correlation coefficient |
|--------|-----------------------------|-------------|-----|-----|-----|-------------------------|
| 1      | 527                         | C22H25O14N1 | 0.6 | 1.1 | 11  | .841**                  |
| 2      | 492                         | C18H20O16   | 0.9 | 1.1 | 9   | .790**                  |
| 3      | 412                         | C18H20O11   | 0.6 | 1.1 | 9   | .925**                  |
| 4      | 366                         | C17H18O9    | 0.5 | 1.1 | 9   | .959**                  |
| 5      | 465                         | C16H19O15N1 | 0.9 | 1.2 | 8   | .855**                  |
| 6      | 433                         | C16H19O13N1 | 0.8 | 1.2 | 8   | .928**                  |
| 7      | 400                         | C16H16O12   | 0.8 | 1.0 | 9   | .758*                   |
| 8      | 368                         | C16H16O10   | 0.6 | 1.0 | 9   | .921**                  |
| 9      | 398                         | C16H14O12   | 0.8 | 0.9 | 10  | .890**                  |
| 10     | 403                         | C15H17O12N1 | 0.8 | 1.1 | 8   | .905**                  |
| 11     | 436                         | C15H16O15   | 1.0 | 1.1 | 8   | .768*                   |
| 12     | 372                         | C15H16O11   | 0.7 | 1.1 | 8   | .635*                   |
| 13     | 356                         | C15H16O10   | 0.7 | 1.1 | 8   | .979**                  |
| 14     | 324                         | C15H16O8    | 0.5 | 1.1 | 8   | .846**                  |
| 15     | 434                         | C15H14O15   | 1.0 | 0.9 | 9   | 0.317                   |
| 16     | 370                         | C15H14O11   | 0.7 | 0.9 | 9   | .884**                  |
| 17     | 354                         | C15H14O10   | 0.7 | 0.9 | 9   | .906**                  |
| 18     | 368                         | C15H12O11   | 0.7 | 0.8 | 10  | 0.601                   |
| 19     | 408                         | C14H16O14   | 1.0 | 1.1 | 7   | .622*                   |
| 20     | 392                         | C14H16O13   | 0.9 | 1.1 | 7   | 0.616                   |
| 21     | 376                         | C14H16O12   | 0.9 | 1.1 | 7   | .811**                  |
| 22     | 360                         | C14H16O11   | 0.8 | 1.1 | 7   | .886**                  |
| 23     | 328                         | C14H16O9    | 0.6 | 1.1 | 7   | .721*                   |
| 24     | 374                         | C14H14O12   | 0.9 | 1.0 | 8   | .800**                  |
| 25     | 358                         | C14H14O11   | 0.8 | 1.0 | 8   | .901**                  |
| 26     | 326                         | C14H14O9    | 0.6 | 1.0 | 8   | .849**                  |
| 27     | 372                         | C14H12O12   | 0.9 | 0.9 | 9   | .664*                   |
| 28     | 324                         | C14H12O9    | 0.6 | 0.9 | 9   | .943**                  |
| 29     | 370                         | C14H10O12   | 0.9 | 0.7 | 10  | 0.541                   |
| 30     | 393                         | C13H15O13N1 | 1.0 | 1.2 | 7   | .934**                  |
| 31     | 345                         | C13H15O10N1 | 0.8 | 1.2 | 7   | .968**                  |
| 32     | 394                         | C13H14O14   | 1.1 | 1.1 | 7   | .933**                  |
| 33     | 346                         | C13H14O11   | 0.8 | 1.1 | 7   | .759*                   |
| 34     | 330                         | C13H14O10   | 0.8 | 1.1 | 7   | .803**                  |
| 35     | 282                         | C13H14O7    | 0.5 | 1.1 | 7   | .876**                  |
| 36     | 391                         | C13H13O13N1 | 1.0 | 1.0 | 8   | .937**                  |
| 37     | 328                         | C13H12O10   | 0.8 | 0.9 | 8   | .810**                  |
| 38     | 326                         | C13H10O10   | 0.8 | 0.8 | 9   | .755*                   |
| 39     | 365                         | C12H15O12N1 | 1.0 | 1.3 | 6   | .971**                  |
| 40     | 333                         | C12H15O10N1 | 0.8 | 1.3 | 6   | .954**                  |

|    |     |             |     |     |   |        |
|----|-----|-------------|-----|-----|---|--------|
| 41 | 301 | C12H15O8N1  | 0.7 | 1.3 | 6 | .960** |
| 42 | 285 | C12H15O7N1  | 0.6 | 1.3 | 6 | .807** |
| 43 | 382 | C12H14O14   | 1.2 | 1.2 | 6 | 0.470  |
| 44 | 350 | C12H14O12   | 1.0 | 1.2 | 6 | .928** |
| 45 | 334 | C12H14O11   | 0.9 | 1.2 | 6 | .665*  |
| 46 | 318 | C12H14O10   | 0.8 | 1.2 | 6 | .769*  |
| 47 | 302 | C12H14O9    | 0.8 | 1.2 | 6 | .882** |
| 48 | 286 | C12H14O8    | 0.7 | 1.2 | 6 | .908** |
| 49 | 380 | C12H12O14   | 1.2 | 1.0 | 7 | .714*  |
| 50 | 348 | C12H12O12   | 1.0 | 1.0 | 7 | .782*  |
| 51 | 332 | C12H12O11   | 0.9 | 1.0 | 7 | .874** |
| 52 | 300 | C12H12O9    | 0.8 | 1.0 | 7 | .896** |
| 53 | 319 | C11H13O10N1 | 0.9 | 1.2 | 6 | .961** |
| 54 | 303 | C11H13O9N1  | 0.8 | 1.2 | 6 | .978** |
| 55 | 287 | C11H13O8N1  | 0.7 | 1.2 | 6 | .917** |
| 56 | 320 | C11H12O11   | 1.0 | 1.1 | 6 | .846** |
| 57 | 288 | C11H12O9    | 0.8 | 1.1 | 6 | 0.291  |
| 58 | 272 | C11H12O8    | 0.7 | 1.1 | 6 | .896** |
| 59 | 256 | C11H12O7    | 0.6 | 1.1 | 6 | .745*  |
| 60 | 349 | C11H11O12N1 | 1.1 | 1.0 | 7 | .774*  |
| 61 | 301 | C11H11O9N1  | 0.8 | 1.0 | 7 | .912** |
| 62 | 285 | C11H11O8N1  | 0.7 | 1.0 | 7 | .846** |
| 63 | 318 | C11H10O11   | 1.0 | 0.9 | 7 | .823** |
| 64 | 286 | C11H10O9    | 0.8 | 0.9 | 7 | .857** |
| 65 | 347 | C11H9O12N1  | 1.1 | 0.8 | 8 | .857** |
| 66 | 284 | C11H8O9     | 0.8 | 0.7 | 8 | .913** |
| 67 | 282 | C11H6O9     | 0.8 | 0.5 | 9 | 0.611  |
| 68 | 355 | C10H13O13N1 | 1.3 | 1.3 | 5 | .817** |
| 69 | 323 | C10H13O11N1 | 1.1 | 1.3 | 5 | .915** |
| 70 | 307 | C10H13O10N1 | 1.0 | 1.3 | 5 | .898** |
| 71 | 291 | C10H13O9N1  | 0.9 | 1.3 | 5 | .930** |
| 72 | 275 | C10H13O8N1  | 0.8 | 1.3 | 5 | .884** |
| 73 | 259 | C10H13O7N1  | 0.7 | 1.3 | 5 | .878** |
| 74 | 243 | C10H13O6N1  | 0.6 | 1.3 | 5 | .909** |
| 75 | 227 | C10H13O5N1  | 0.5 | 1.3 | 5 | 0.313  |
| 76 | 211 | C10H13O4N1  | 0.4 | 1.3 | 5 | .728*  |
| 77 | 340 | C10H12O13   | 1.3 | 1.2 | 5 | .728*  |
| 78 | 308 | C10H12O11   | 1.1 | 1.2 | 5 | -0.453 |
| 79 | 292 | C10H12O10   | 1.0 | 1.2 | 5 | 0.051  |
| 80 | 276 | C10H12O9    | 0.9 | 1.2 | 5 | .756*  |
| 81 | 260 | C10H12O8    | 0.8 | 1.2 | 5 | .868** |
| 82 | 244 | C10H12O7    | 0.7 | 1.2 | 5 | .826** |
| 83 | 228 | C10H12O6    | 0.6 | 1.2 | 5 | .786*  |
| 84 | 196 | C10H12O4    | 0.4 | 1.2 | 5 | .814** |

|     |     |             |     |     |   |        |
|-----|-----|-------------|-----|-----|---|--------|
| 85  | 180 | C10H12O3    | 0.3 | 1.2 | 5 | .813** |
| 86  | 353 | C10H11O13N1 | 1.3 | 1.1 | 6 | .926** |
| 87  | 305 | C10H11O10N1 | 1.0 | 1.1 | 6 | .901** |
| 88  | 273 | C10H11O8N1  | 0.8 | 1.1 | 6 | .943** |
| 89  | 257 | C10H11O7N1  | 0.7 | 1.1 | 6 | .981** |
| 90  | 306 | C10H10O11   | 1.1 | 1.0 | 6 | .816** |
| 91  | 290 | C10H10O10   | 1.0 | 1.0 | 6 | .900** |
| 92  | 274 | C10H10O9    | 0.9 | 1.0 | 6 | .688*  |
| 93  | 258 | C10H10O8    | 0.8 | 1.0 | 6 | .886** |
| 94  | 242 | C10H10O7    | 0.7 | 1.0 | 6 | .771*  |
| 95  | 304 | C10H8O11    | 1.1 | 0.8 | 7 | .836** |
| 96  | 288 | C10H8O10    | 1.0 | 0.8 | 7 | .890** |
| 97  | 256 | C10H8O8     | 0.8 | 0.8 | 7 | .888** |
| 98  | 309 | C9H11O11N1  | 1.2 | 1.2 | 5 | .928** |
| 99  | 293 | C9H11O10N1  | 1.1 | 1.2 | 5 | .912** |
| 100 | 277 | C9H11O9N1   | 1.0 | 1.2 | 5 | .948** |
| 101 | 261 | C9H11O8N1   | 0.9 | 1.2 | 5 | .920** |
| 102 | 245 | C9H11O7N1   | 0.8 | 1.2 | 5 | .906** |
| 103 | 229 | C9H11O6N1   | 0.7 | 1.2 | 5 | .934** |
| 104 | 213 | C9H11O5N1   | 0.6 | 1.2 | 5 | .909** |
| 105 | 310 | C9H10O12    | 1.3 | 1.1 | 5 | 0.605  |
| 106 | 294 | C9H10O11    | 1.2 | 1.1 | 5 | 0.570  |
| 107 | 278 | C9H10O10    | 1.1 | 1.1 | 5 | .657*  |
| 108 | 262 | C9H10O9     | 1.0 | 1.1 | 5 | 0.356  |
| 109 | 246 | C9H10O8     | 0.9 | 1.1 | 5 | .672*  |
| 110 | 230 | C9H10O7     | 0.8 | 1.1 | 5 | .831** |
| 111 | 214 | C9H10O6     | 0.7 | 1.1 | 5 | .762*  |
| 112 | 198 | C9H10O5     | 0.6 | 1.1 | 5 | 0.417  |
| 113 | 182 | C9H10O4     | 0.4 | 1.1 | 5 | .832** |
| 114 | 307 | C9H9O11N1   | 1.2 | 1.0 | 6 | .966** |
| 115 | 259 | C9H9O8N1    | 0.9 | 1.0 | 6 | .960** |
| 116 | 211 | C9H9O5N1    | 0.6 | 1.0 | 6 | .892** |
| 117 | 308 | C9H8O12     | 1.3 | 0.9 | 6 | 0.481  |
| 118 | 292 | C9H8O11     | 1.2 | 0.9 | 6 | .811** |
| 119 | 260 | C9H8O9      | 1.0 | 0.9 | 6 | .680*  |
| 120 | 228 | C9H8O7      | 0.8 | 0.9 | 6 | .853** |
| 121 | 313 | C8H11O12N1  | 1.5 | 1.4 | 4 | .804** |
| 122 | 297 | C8H11O11N1  | 1.4 | 1.4 | 4 | .897** |
| 123 | 281 | C8H11O10N1  | 1.3 | 1.4 | 4 | .883** |
| 124 | 265 | C8H11O9N1   | 1.1 | 1.4 | 4 | .868** |
| 125 | 249 | C8H11O8N1   | 1.0 | 1.4 | 4 | .706*  |
| 126 | 233 | C8H11O7N1   | 0.9 | 1.4 | 4 | 0.233  |
| 127 | 217 | C8H11O6N1   | 0.8 | 1.4 | 4 | .832** |
| 128 | 201 | C8H11O5N1   | 0.6 | 1.4 | 4 | .706*  |

|     |     |           |     |     |   |        |
|-----|-----|-----------|-----|-----|---|--------|
| 129 | 185 | C8H11O4N1 | 0.5 | 1.4 | 4 | 0.394  |
| 130 | 169 | C8H11O3N1 | 0.4 | 1.4 | 4 | -0.127 |
| 131 | 266 | C8H10O10  | 1.3 | 1.3 | 4 | 0.578  |
| 132 | 250 | C8H10O9   | 1.1 | 1.3 | 4 | .909** |
| 133 | 234 | C8H10O8   | 1.0 | 1.3 | 4 | 0.488  |
| 134 | 218 | C8H10O7   | 0.9 | 1.3 | 4 | .716*  |
| 135 | 202 | C8H10O6   | 0.8 | 1.3 | 4 | .645*  |
| 136 | 186 | C8H10O5   | 0.6 | 1.3 | 4 | -0.024 |
| 137 | 170 | C8H10O4   | 0.5 | 1.3 | 4 | 0.103  |
| 138 | 154 | C8H10O3   | 0.4 | 1.3 | 4 | 0.475  |
| 139 | 295 | C8H9O11N1 | 1.4 | 1.1 | 5 | .926** |
| 140 | 279 | C8H9O10N1 | 1.3 | 1.1 | 5 | 0.405  |
| 141 | 263 | C8H9O9N1  | 1.1 | 1.1 | 5 | -.629* |
| 142 | 247 | C8H9O8N1  | 1.0 | 1.1 | 5 | -0.040 |
| 143 | 231 | C8H9O7N1  | 0.9 | 1.1 | 5 | .960** |
| 144 | 215 | C8H9O6N1  | 0.8 | 1.1 | 5 | .889** |
| 145 | 199 | C8H9O5N1  | 0.6 | 1.1 | 5 | 0.587  |
| 146 | 183 | C8H9O4N1  | 0.5 | 1.1 | 5 | .857** |
| 147 | 280 | C8H8O11   | 1.4 | 1.0 | 5 | .732*  |
| 148 | 264 | C8H8O10   | 1.3 | 1.0 | 5 | .710*  |
| 149 | 248 | C8H8O9    | 1.1 | 1.0 | 5 | .859** |
| 150 | 232 | C8H8O8    | 1.0 | 1.0 | 5 | 0.573  |
| 151 | 216 | C8H8O7    | 0.9 | 1.0 | 5 | 0.554  |
| 152 | 200 | C8H8O6    | 0.8 | 1.0 | 5 | .691*  |
| 153 | 184 | C8H8O5    | 0.6 | 1.0 | 5 | 0.358  |
| 154 | 168 | C8H8O4    | 0.5 | 1.0 | 5 | 0.418  |
| 155 | 229 | C8H7O7N1  | 0.9 | 0.9 | 6 | .922** |
| 156 | 213 | C8H7O6N1  | 0.8 | 0.9 | 6 | .941** |
| 157 | 262 | C8H6O10   | 1.3 | 0.8 | 6 | .642*  |
| 158 | 230 | C8H6O8    | 1.0 | 0.8 | 6 | 0.342  |
| 159 | 182 | C8H6O5    | 0.6 | 0.8 | 6 | 0.111  |
| 160 | 267 | C7H9O10N1 | 1.4 | 1.3 | 4 | .866** |
| 161 | 251 | C7H9O9N1  | 1.3 | 1.3 | 4 | .874** |
| 162 | 235 | C7H9O8N1  | 1.1 | 1.3 | 4 | .751*  |
| 163 | 219 | C7H9O7N1  | 1.0 | 1.3 | 4 | .725*  |
| 164 | 203 | C7H9O6N1  | 0.9 | 1.3 | 4 | .817** |
| 165 | 187 | C7H9O5N1  | 0.7 | 1.3 | 4 | 0.486  |
| 166 | 171 | C7H9O4N1  | 0.6 | 1.3 | 4 | 0.208  |
| 167 | 155 | C7H9O3N1  | 0.4 | 1.3 | 4 | .842** |
| 168 | 123 | C7H9O1N1  | 0.1 | 1.3 | 4 | 0.581  |
| 169 | 268 | C7H8O11   | 1.6 | 1.1 | 4 | .639*  |
| 170 | 252 | C7H8O10   | 1.4 | 1.1 | 4 | 0.556  |
| 171 | 236 | C7H8O9    | 1.3 | 1.1 | 4 | .663*  |
| 172 | 220 | C7H8O8    | 1.1 | 1.1 | 4 | 0.444  |

|     |     |           |     |     |   |        |
|-----|-----|-----------|-----|-----|---|--------|
| 173 | 204 | C7H8O7    | 1.0 | 1.1 | 4 | 0.437  |
| 174 | 188 | C7H8O6    | 0.9 | 1.1 | 4 | 0.554  |
| 175 | 172 | C7H8O5    | 0.7 | 1.1 | 4 | 0.377  |
| 176 | 156 | C7H8O4    | 0.6 | 1.1 | 4 | 0.397  |
| 177 | 140 | C7H8O3    | 0.4 | 1.1 | 4 | .671*  |
| 178 | 249 | C7H7O9N1  | 1.3 | 1.0 | 5 | 0.517  |
| 179 | 233 | C7H7O8N1  | 1.1 | 1.0 | 5 | -0.601 |
| 180 | 217 | C7H7O7N1  | 1.0 | 1.0 | 5 | .873** |
| 181 | 201 | C7H7O6N1  | 0.9 | 1.0 | 5 | .748*  |
| 182 | 185 | C7H7O5N1  | 0.7 | 1.0 | 5 | .919** |
| 183 | 266 | C7H6O11   | 1.6 | 0.9 | 5 | 0.591  |
| 184 | 250 | C7H6O10   | 1.4 | 0.9 | 5 | 0.189  |
| 185 | 218 | C7H6O8    | 1.1 | 0.9 | 5 | 0.216  |
| 186 | 202 | C7H6O7    | 1.0 | 0.9 | 5 | 0.230  |
| 187 | 186 | C7H6O6    | 0.9 | 0.9 | 5 | .716*  |
| 188 | 170 | C7H6O5    | 0.7 | 0.9 | 5 | 0.407  |
| 189 | 154 | C7H6O4    | 0.6 | 0.9 | 5 | 0.161  |
| 190 | 271 | C6H9O11N1 | 1.8 | 1.5 | 3 | .976** |
| 191 | 255 | C6H9O10N1 | 1.7 | 1.5 | 3 | .916** |
| 192 | 239 | C6H9O9N1  | 1.5 | 1.5 | 3 | .850** |
| 193 | 223 | C6H9O8N1  | 1.3 | 1.5 | 3 | .831** |
| 194 | 207 | C6H9O7N1  | 1.2 | 1.5 | 3 | .868** |
| 195 | 191 | C6H9O6N1  | 1.0 | 1.5 | 3 | .753*  |
| 196 | 175 | C6H9O5N1  | 0.8 | 1.5 | 3 | .738*  |
| 197 | 159 | C6H9O4N1  | 0.7 | 1.5 | 3 | 0.323  |
| 198 | 143 | C6H9O3N1  | 0.5 | 1.5 | 3 | 0.084  |
| 199 | 127 | C6H9O2N1  | 0.3 | 1.5 | 3 | 0.398  |
| 200 | 240 | C6H8O10   | 1.7 | 1.3 | 3 | 0.533  |
| 201 | 224 | C6H8O9    | 1.5 | 1.3 | 3 | .770*  |
| 202 | 208 | C6H8O8    | 1.3 | 1.3 | 3 | 0.429  |
| 203 | 192 | C6H8O7    | 1.2 | 1.3 | 3 | 0.537  |
| 204 | 176 | C6H8O6    | 1.0 | 1.3 | 3 | 0.549  |
| 205 | 160 | C6H8O5    | 0.8 | 1.3 | 3 | 0.553  |
| 206 | 144 | C6H8O4    | 0.7 | 1.3 | 3 | -0.176 |
| 207 | 128 | C6H8O3    | 0.5 | 1.3 | 3 | 0.250  |
| 208 | 112 | C6H8O2    | 0.3 | 1.3 | 3 | 0.419  |
| 209 | 269 | C6H7O11N1 | 1.8 | 1.2 | 4 | .791** |
| 210 | 253 | C6H7O10N1 | 1.7 | 1.2 | 4 | .802** |
| 211 | 237 | C6H7O9N1  | 1.5 | 1.2 | 4 | .885** |
| 212 | 221 | C6H7O8N1  | 1.3 | 1.2 | 4 | .955** |
| 213 | 205 | C6H7O7N1  | 1.2 | 1.2 | 4 | .641*  |
| 214 | 189 | C6H7O6N1  | 1.0 | 1.2 | 4 | .799** |
| 215 | 173 | C6H7O5N1  | 0.8 | 1.2 | 4 | 0.426  |
| 216 | 157 | C6H7O4N1  | 0.7 | 1.2 | 4 | 0.193  |

|     |     |           |     |     |   |        |
|-----|-----|-----------|-----|-----|---|--------|
| 217 | 141 | C6H7O3N1  | 0.5 | 1.2 | 4 | -0.041 |
| 218 | 238 | C6H6O10   | 1.7 | 1.0 | 4 | .654*  |
| 219 | 222 | C6H6O9    | 1.5 | 1.0 | 4 | 0.138  |
| 220 | 206 | C6H6O8    | 1.3 | 1.0 | 4 | 0.011  |
| 221 | 190 | C6H6O7    | 1.2 | 1.0 | 4 | 0.382  |
| 222 | 174 | C6H6O6    | 1.0 | 1.0 | 4 | 0.285  |
| 223 | 158 | C6H6O5    | 0.8 | 1.0 | 4 | 0.384  |
| 224 | 142 | C6H6O4    | 0.7 | 1.0 | 4 | 0.028  |
| 225 | 126 | C6H6O3    | 0.5 | 1.0 | 4 | 0.295  |
| 226 | 110 | C6H6O2    | 0.3 | 1.0 | 4 | 0.108  |
| 227 | 235 | C6H5O9N1  | 1.5 | 0.8 | 5 | .761*  |
| 228 | 203 | C6H5O7N1  | 1.2 | 0.8 | 5 | 0.265  |
| 229 | 187 | C6H5O6N1  | 1.0 | 0.8 | 5 | .646*  |
| 230 | 123 | C6H5O2N1  | 0.3 | 0.8 | 5 | 0.238  |
| 231 | 91  | C6H5N1    | 0.0 | 0.8 | 5 | 0.222  |
| 232 | 220 | C6H4O9    | 1.5 | 0.7 | 5 | 0.589  |
| 233 | 204 | C6H4O8    | 1.3 | 0.7 | 5 | .684*  |
| 234 | 188 | C6H4O7    | 1.2 | 0.7 | 5 | 0.203  |
| 235 | 172 | C6H4O6    | 1.0 | 0.7 | 5 | 0.463  |
| 236 | 156 | C6H4O5    | 0.8 | 0.7 | 5 | 0.372  |
| 237 | 140 | C6H4O4    | 0.7 | 0.7 | 5 | .715*  |
| 238 | 241 | C5H7O10N1 | 2.0 | 1.4 | 3 | 0.273  |
| 239 | 225 | C5H7O9N1  | 1.8 | 1.4 | 3 | .752*  |
| 240 | 209 | C5H7O8N1  | 1.6 | 1.4 | 3 | .914** |
| 241 | 193 | C5H7O7N1  | 1.4 | 1.4 | 3 | 0.519  |
| 242 | 177 | C5H7O6N1  | 1.2 | 1.4 | 3 | .784*  |
| 243 | 161 | C5H7O5N1  | 1.0 | 1.4 | 3 | 0.566  |
| 244 | 145 | C5H7O4N1  | 0.8 | 1.4 | 3 | 0.282  |
| 245 | 129 | C5H7O3N1  | 0.6 | 1.4 | 3 | 0.589  |
| 246 | 113 | C5H7O2N1  | 0.4 | 1.4 | 3 | 0.039  |
| 247 | 210 | C5H6O9    | 1.8 | 1.2 | 3 | 0.572  |
| 248 | 194 | C5H6O8    | 1.6 | 1.2 | 3 | 0.414  |
| 249 | 178 | C5H6O7    | 1.4 | 1.2 | 3 | 0.543  |
| 250 | 162 | C5H6O6    | 1.2 | 1.2 | 3 | 0.347  |
| 251 | 146 | C5H6O5    | 1.0 | 1.2 | 3 | 0.448  |
| 252 | 130 | C5H6O4    | 0.8 | 1.2 | 3 | 0.014  |
| 253 | 114 | C5H6O3    | 0.6 | 1.2 | 3 | 0.086  |
| 254 | 223 | C5H5O9N1  | 1.8 | 1.0 | 4 | .782*  |
| 255 | 207 | C5H5O8N1  | 1.6 | 1.0 | 4 | .694*  |
| 256 | 191 | C5H5O7N1  | 1.4 | 1.0 | 4 | -0.175 |
| 257 | 175 | C5H5O6N1  | 1.2 | 1.0 | 4 | 0.151  |
| 258 | 159 | C5H5O5N1  | 1.0 | 1.0 | 4 | 0.501  |
| 259 | 143 | C5H5O4N1  | 0.8 | 1.0 | 4 | 0.135  |
| 260 | 127 | C5H5O3N1  | 0.6 | 1.0 | 4 | -0.341 |



|     |     |          |     |     |   |        |
|-----|-----|----------|-----|-----|---|--------|
| 261 | 111 | C5H5O2N1 | 0.4 | 1.0 | 4 | -0.123 |
| 262 | 208 | C5H4O9   | 1.8 | 0.8 | 4 | 0.102  |
| 263 | 192 | C5H4O8   | 1.6 | 0.8 | 4 | -0.128 |
| 264 | 176 | C5H4O7   | 1.4 | 0.8 | 4 | 0.566  |
| 265 | 144 | C5H4O5   | 1.0 | 0.8 | 4 | 0.187  |
| 266 | 128 | C5H4O4   | 0.8 | 0.8 | 4 | -0.049 |
| 267 | 112 | C5H4O3   | 0.6 | 0.8 | 4 | 0.360  |
| 268 | 80  | C5H4O1   | 0.2 | 0.8 | 4 | -0.295 |
| 269 | 197 | C4H7O8N1 | 2.0 | 1.8 | 2 | .914** |
| 270 | 181 | C4H7O7N1 | 1.8 | 1.8 | 2 | .865** |
| 271 | 165 | C4H7O6N1 | 1.5 | 1.8 | 2 | .630*  |
| 272 | 149 | C4H7O5N1 | 1.3 | 1.8 | 2 | 0.605  |
| 273 | 133 | C4H7O4N1 | 1.0 | 1.8 | 2 | 0.439  |
| 274 | 117 | C4H7O3N1 | 0.8 | 1.8 | 2 | 0.083  |
| 275 | 85  | C4H7O1N1 | 0.3 | 1.8 | 2 | 0.520  |
| 276 | 182 | C4H6O8   | 2.0 | 1.5 | 2 | 0.329  |
| 277 | 166 | C4H6O7   | 1.8 | 1.5 | 2 | -0.004 |
| 278 | 150 | C4H6O6   | 1.5 | 1.5 | 2 | 0.553  |
| 279 | 134 | C4H6O5   | 1.3 | 1.5 | 2 | 0.534  |
| 280 | 118 | C4H6O4   | 1.0 | 1.5 | 2 | 0.044  |
| 281 | 102 | C4H6O3   | 0.8 | 1.5 | 2 | 0.002  |
| 282 | 86  | C4H6O2   | 0.5 | 1.5 | 2 | -0.238 |
| 283 | 70  | C4H6O1   | 0.3 | 1.5 | 2 | -0.469 |
| 284 | 211 | C4H5O9N1 | 2.3 | 1.3 | 3 | .664*  |
| 285 | 195 | C4H5O8N1 | 2.0 | 1.3 | 3 | -.687* |
| 286 | 179 | C4H5O7N1 | 1.8 | 1.3 | 3 | .853** |
| 287 | 163 | C4H5O6N1 | 1.5 | 1.3 | 3 | 0.271  |
| 288 | 147 | C4H5O5N1 | 1.3 | 1.3 | 3 | 0.259  |
| 289 | 131 | C4H5O4N1 | 1.0 | 1.3 | 3 | 0.252  |
| 290 | 99  | C4H5O2N1 | 0.5 | 1.3 | 3 | -0.171 |
| 291 | 196 | C4H4O9   | 2.3 | 1.0 | 3 | 0.341  |
| 292 | 180 | C4H4O8   | 2.0 | 1.0 | 3 | 0.271  |
| 293 | 164 | C4H4O7   | 1.8 | 1.0 | 3 | 0.267  |
| 294 | 148 | C4H4O6   | 1.5 | 1.0 | 3 | 0.287  |
| 295 | 132 | C4H4O5   | 1.3 | 1.0 | 3 | 0.460  |
| 296 | 116 | C4H4O4   | 1.0 | 1.0 | 3 | -0.033 |
| 297 | 84  | C4H4O2   | 0.5 | 1.0 | 3 | 0.509  |
| 298 | 68  | C4H4O1   | 0.3 | 1.0 | 3 | -0.469 |
| 299 | 199 | C3H5O9N1 | 3.0 | 1.7 | 2 | .733*  |
| 300 | 183 | C3H5O8N1 | 2.7 | 1.7 | 2 | .706*  |
| 301 | 167 | C3H5O7N1 | 2.3 | 1.7 | 2 | -0.182 |
| 302 | 151 | C3H5O6N1 | 2.0 | 1.7 | 2 | .754*  |
| 303 | 135 | C3H5O5N1 | 1.7 | 1.7 | 2 | .701*  |
| 304 | 119 | C3H5O4N1 | 1.3 | 1.7 | 2 | 0.542  |

|     |     |          |     |     |   |        |
|-----|-----|----------|-----|-----|---|--------|
| 305 | 103 | C3H5O3N1 | 1.0 | 1.7 | 2 | -0.015 |
| 306 | 87  | C3H5O2N1 | 0.7 | 1.7 | 2 | -0.112 |
| 307 | 168 | C3H4O8   | 2.7 | 1.3 | 2 | 0.456  |
| 308 | 152 | C3H4O7   | 2.3 | 1.3 | 2 | 0.009  |
| 309 | 136 | C3H4O6   | 2.0 | 1.3 | 2 | 0.270  |
| 310 | 120 | C3H4O5   | 1.7 | 1.3 | 2 | 0.480  |
| 311 | 104 | C3H4O4   | 1.3 | 1.3 | 2 | 0.138  |
| 312 | 88  | C3H4O3   | 1.0 | 1.3 | 2 | 0.339  |
| 313 | 72  | C3H4O2   | 0.7 | 1.3 | 2 | -0.298 |
| 314 | 92  | C2H4O4   | 2.0 | 2.0 | 1 | 0.177  |
| 315 | 76  | C2H4O3   | 1.5 | 2.0 | 1 | -0.217 |
| 316 | 60  | C2H4O2   | 1.0 | 2.0 | 1 | 0.025  |

Pearson's correlation coefficient (1-sided t test), \*\*:  $p < 0.01$ , \*:  $p < 0.05$

85

**Table S9.** Mass absorption coefficients (MAC) ( $\text{m}^2\text{g}^{-1}$ ) were determined for different nitro-aromatic compounds by (Xie et al., 2020).

| Formula                                         | Mass ( $\text{g mol}^{-1}$ ) | MAC <sub>365</sub> ( $\text{m}^2 \text{g}^{-1}$ ) |
|-------------------------------------------------|------------------------------|---------------------------------------------------|
| C <sub>6</sub> H <sub>5</sub> NO <sub>3</sub>   | 139                          | 2.4                                               |
| C <sub>7</sub> H <sub>7</sub> NO <sub>3</sub>   | 153                          | 3.2                                               |
| C <sub>6</sub> H <sub>5</sub> NO <sub>4</sub>   | 155                          | 7.0                                               |
| C <sub>7</sub> H <sub>7</sub> NO <sub>4</sub>   | 169                          | 12.9                                              |
| C <sub>8</sub> H <sub>9</sub> NO <sub>4</sub>   | 183                          | 12.9                                              |
| C <sub>7</sub> H <sub>7</sub> NO <sub>5</sub>   | 185                          | 14.0                                              |
| C <sub>10</sub> H <sub>7</sub> NO <sub>3</sub>  | 189                          | 3.8                                               |
| C <sub>9</sub> H <sub>9</sub> NO <sub>4</sub>   | 195                          | 12.9                                              |
| C <sub>8</sub> H <sub>7</sub> NO <sub>5</sub>   | 197                          | 12.9                                              |
| C <sub>8</sub> H <sub>9</sub> NO <sub>5</sub>   | 199                          | 14.0                                              |
| C <sub>11</sub> H <sub>9</sub> NO <sub>3</sub>  | 203                          | 3.8                                               |
| C <sub>10</sub> H <sub>11</sub> NO <sub>5</sub> | 225                          | 14.0                                              |
| Average                                         | -                            | 9.5±4.7                                           |

90 Table S10. Correlations of fluorescent components with NACs and potential brown carbon molecules. PARAFAC components are listed from C1 to C4. Blank cells indicate no association, and cells with the value 1 indicate an association.

| Formula     | C1     | C2      | C3      | C4     | C1 | C2 | C3 | C4 |
|-------------|--------|---------|---------|--------|----|----|----|----|
| C22H25O14N1 | .684*  | -.720*  | -.723*  | -0.423 | 1  |    |    |    |
| C18H20O16   | 0.606  | -0.413  | -0.615  | -0.509 |    |    |    |    |
| C18H20O11   | .929** | -.836** | -.924** | -.687* | 1  |    |    |    |
| C17H18O9    | .895** | -.886** | -.959** | -0.574 | 1  |    |    |    |
| C16H19O15N1 | .695*  | -.674*  | -.765*  | -0.441 | 1  |    |    |    |
| C16H19O13N1 | .816** | -.794** | -.851** | -0.546 | 1  |    |    |    |
| C16H16O12   | 0.564  | -0.516  | -.670*  | -0.341 |    |    |    |    |
| C16H16O10   | .902** | -.889** | -.904** | -.622* | 1  |    |    |    |
| C16H14O12   | .755*  | -.634*  | -.674*  | -.631* | 1  |    |    |    |
| C15H17O12N1 | .852** | -.852** | -.882** | -0.563 | 1  |    |    |    |
| C15H16O15   | 0.596  | -0.571  | -0.527  | -0.465 |    |    |    |    |
| C15H16O11   | .688*  | -0.572  | -.752*  | -0.488 | 1  |    |    |    |
| C15H16O10   | .910** | -.825** | -.893** | -.677* | 1  |    |    |    |
| C15H16O8    | .648*  | -.783*  | -.785*  | -0.283 | 1  |    |    |    |
| C15H14O15   | -0.165 | 0.087   | 0.177   | 0.147  |    |    |    |    |
| C15H14O11   | .752*  | -.727*  | -.726*  | -0.544 | 1  |    |    |    |
| C15H14O10   | .803** | -.632*  | -.759*  | -.666* | 1  |    |    |    |
| C15H12O11   | 0.220  | -0.148  | -0.185  | -0.211 |    |    |    |    |
| C14H16O14   | 0.322  | -0.331  | -0.294  | -0.234 |    |    |    |    |
| C14H16O13   | 0.393  | 0.012   | -0.376  | -0.490 |    |    |    |    |
| C14H16O12   | .734*  | -0.535  | -.784*  | -0.571 | 1  |    |    |    |
| C14H16O11   | .937** | -.752*  | -.918** | -.749* | 1  |    |    |    |
| C14H16O9    | .772*  | -0.488  | -0.619  | -.775* | 1  |    |    |    |
| C14H14O12   | .672*  | -0.511  | -0.573  | -0.608 | 1  |    |    |    |
| C14H14O11   | .791** | -0.540  | -.713*  | -.721* | 1  |    |    |    |
| C14H14O9    | .862** | -.809** | -.912** | -0.583 | 1  |    |    |    |
| C14H12O12   | 0.322  | -0.319  | -0.310  | -0.229 |    |    |    |    |
| C14H12O9    | .624*  | -0.618  | -0.604  | -0.441 | 1  |    |    |    |
| C14H10O12   | 0.181  | -0.019  | -0.063  | -0.285 |    |    |    |    |
| C13H15O13N1 | .881** | -.777*  | -.852** | -.676* | 1  |    |    |    |
| C13H15O10N1 | .876** | -.885** | -.926** | -0.562 | 1  |    |    |    |
| C13H14O14   | .901** | -.859** | -.926** | -0.621 | 1  |    |    |    |
| C13H14O11   | .659*  | -0.573  | -.674*  | -0.485 | 1  |    |    |    |
| C13H14O10   | .863** | -.630*  | -.799** | -.753* | 1  |    |    |    |
| C13H14O7    | 0.221  | -0.297  | -0.218  | -0.113 |    |    |    |    |
| C13H13O13N1 | .857** | -.899** | -.916** | -0.524 | 1  |    |    |    |
| C13H12O10   | .711*  | -.637*  | -.714*  | -0.522 | 1  |    |    |    |
| C13H10O10   | 0.614  | -0.510  | -0.579  | -0.497 |    |    |    |    |
| C12H15O12N1 | .917** | -.866** | -.881** | -.675* | 1  |    |    |    |
| C12H15O10N1 | .872** | -.770*  | -.840** | -.669* | 1  |    |    |    |
| C12H15O8N1  | .807** | -.879** | -.801** | -0.518 | 1  |    |    |    |

|             |        |         |         |         |   |
|-------------|--------|---------|---------|---------|---|
| C12H15O7N1  | .695*  | -.782*  | -.742*  | -0.398  | 1 |
| C12H14O14   | -0.072 | -0.135  | 0.040   | 0.177   |   |
| C12H14O12   | .736*  | -.688*  | -.722*  | -0.536  | 1 |
| C12H14O11   | 0.600  | -0.385  | -0.534  | -0.564  |   |
| C12H14O10   | .776*  | -0.574  | -.764*  | -.642*  | 1 |
| C12H14O9    | .784*  | -0.618  | -.780*  | -.625*  | 1 |
| C12H14O8    | 0.600  | -0.558  | -0.454  | -0.527  |   |
| C12H12O14   | 0.347  | -0.337  | -0.369  | -0.228  |   |
| C12H12O12   | 0.477  | -0.574  | -0.506  | -0.256  |   |
| C12H12O11   | .881** | -0.589  | -.783*  | -.817** | 1 |
| C12H12O9    | .899** | -.745*  | -.847** | -.728*  | 1 |
| C11H13O10N1 | .895** | -.852** | -.850** | -.663*  | 1 |
| C11H13O9N1  | .887** | -.852** | -.924** | -0.599  | 1 |
| C11H13O8N1  | .940** | -.803** | -.942** | -.712*  | 1 |
| C11H12O11   | 0.441  | -0.576  | -0.375  | -0.275  |   |
| C11H12O9    | 0.204  | 0.090   | 0.024   | -0.441  |   |
| C11H12O8    | .911** | -.705*  | -.790** | -.808** | 1 |
| C11H12O7    | 0.582  | -0.300  | -0.449  | -.632*  |   |
| C11H11O12N1 | 0.557  | -0.536  | -.658*  | -0.326  |   |
| C11H11O9N1  | .888** | -.720*  | -.817** | -.741*  | 1 |
| C11H11O8N1  | .731*  | -.701*  | -.759*  | -0.496  | 1 |
| C11H10O11   | 0.267  | -0.107  | -0.034  | -0.419  |   |
| C11H10O9    | .874** | -0.564  | -.727*  | -.853** | 1 |
| C11H9O12N1  | .693*  | -.782*  | -.740*  | -0.396  | 1 |
| C11H8O9     | .796** | -.710*  | -.749*  | -0.619  | 1 |
| C11H6O9     | 0.013  | -0.062  | 0.034   | -0.014  |   |
| C10H13O13N1 | 0.423  | -0.508  | -.635*  | -0.107  |   |
| C10H13O11N1 | .815** | -.733*  | -.815** | -0.600  | 1 |
| C10H13O10N1 | .802** | -.916** | -.930** | -0.404  | 1 |
| C10H13O9N1  | .717*  | -.690*  | -.747*  | -0.485  | 1 |
| C10H13O8N1  | .672*  | -.728*  | -.714*  | -0.401  | 1 |
| C10H13O7N1  | .663*  | -.731*  | -.774*  | -0.345  | 1 |
| C10H13O6N1  | .861** | -.884** | -.918** | -0.539  | 1 |
| C10H13O5N1  | -0.253 | 0.305   | 0.168   | 0.201   |   |
| C10H13O4N1  | 0.426  | -0.179  | -0.122  | -0.617  |   |
| C10H12O13   | 0.534  | -0.446  | -0.578  | -0.382  |   |
| C10H12O11   | -0.307 | 0.413   | 0.465   | 0.052   |   |
| C10H12O10   | 0.064  | 0.005   | 0.059   | -0.159  |   |
| C10H12O9    | 0.528  | -0.304  | -0.292  | -.632*  |   |
| C10H12O8    | 0.320  | -0.079  | -0.170  | -0.442  |   |
| C10H12O7    | 0.560  | -0.358  | -0.361  | -0.617  |   |
| C10H12O6    | 0.225  | -0.004  | 0.090   | -0.475  |   |
| C10H12O4    | .685*  | -0.520  | -0.566  | -.632*  | 1 |
| C10H12O3    | 0.591  | -.692*  | -.744*  | -0.252  |   |

|             |        |         |         |         |   |
|-------------|--------|---------|---------|---------|---|
| C10H11O13N1 | .841** | -.798** | -.905** | -0.555  | 1 |
| C10H11O10N1 | 0.581  | -0.411  | -0.499  | -0.539  |   |
| C10H11O8N1  | .943** | -.749*  | -.818** | -.825** | 1 |
| C10H11O7N1  | .895** | -.852** | -.902** | -.629*  | 1 |
| C10H10O11   | 0.489  | -0.280  | -0.234  | -0.609  |   |
| C10H10O10   | 0.176  | -0.292  | -0.114  | -0.101  |   |
| C10H10O9    | 0.210  | 0.101   | 0.031   | -0.463  |   |
| C10H10O8    | .724*  | -0.416  | -0.534  | -.779*  | 1 |
| C10H10O7    | .711*  | -0.265  | -0.576  | -.805** | 1 |
| C10H8O11    | .777*  | -0.501  | -.680*  | -.737*  | 1 |
| C10H8O10    | .672*  | -0.515  | -.687*  | -0.531  | 1 |
| C10H8O8     | .716*  | -.684*  | -.714*  | -0.507  | 1 |
| C9H11O11N1  | .677*  | -.680*  | -.663*  | -0.470  | 1 |
| C9H11O10N1  | .685*  | -.753*  | -.699*  | -0.423  | 1 |
| C9H11O9N1   | 0.607  | -0.592  | -0.522  | -0.477  |   |
| C9H11O8N1   | .649*  | -.724*  | -.708*  | -0.366  | 1 |
| C9H11O7N1   | .672*  | -.718*  | -.732*  | -0.396  | 1 |
| C9H11O6N1   | .878** | -.825** | -.778*  | -.692*  | 1 |
| C9H11O5N1   | .836** | -.789** | -.869** | -0.574  | 1 |
| C9H10O12    | -0.241 | 0.225   | 0.260   | 0.161   |   |
| C9H10O11    | 0.246  | -0.369  | -0.122  | -0.185  |   |
| C9H10O10    | 0.194  | 0.202   | 0.098   | -0.530  |   |
| C9H10O9     | 0.209  | 0.002   | -0.100  | -0.324  |   |
| C9H10O8     | -0.105 | 0.241   | 0.361   | -0.166  |   |
| C9H10O7     | 0.331  | -0.175  | -0.065  | -0.480  |   |
| C9H10O6     | -0.133 | 0.265   | 0.407   | -0.157  |   |
| C9H10O5     | 0.154  | 0.062   | -0.171  | -0.206  |   |
| C9H10O4     | .666*  | -0.380  | -.671*  | -0.601  | 1 |
| C9H9O11N1   | .704*  | -.639*  | -.649*  | -0.550  | 1 |
| C9H9O8N1    | .766*  | -.809** | -.810** | -0.471  | 1 |
| C9H9O5N1    | .894** | -.823** | -.857** | -.672*  | 1 |
| C9H8O12     | -0.090 | 0.498   | 0.380   | -0.340  |   |
| C9H8O11     | 0.400  | -0.361  | -0.306  | -0.354  |   |
| C9H8O9      | 0.195  | -0.045  | 0.024   | -0.355  |   |
| C9H8O7      | 0.297  | -0.402  | -0.492  | -0.021  |   |
| C8H11O12N1  | 0.493  | -0.564  | -0.616  | -0.220  |   |
| C8H11O11N1  | .831** | -.790** | -.837** | -0.584  | 1 |
| C8H11O10N1  | 0.509  | -0.427  | -0.544  | -0.369  |   |
| C8H11O9N1   | 0.583  | -0.556  | -0.564  | -0.424  |   |
| C8H11O8N1   | 0.033  | -0.133  | -0.203  | 0.140   |   |
| C8H11O7N1   | -0.041 | -0.096  | -0.225  | 0.273   |   |
| C8H11O6N1   | 0.601  | -.814** | -.722*  | -0.221  |   |
| C8H11O5N1   | -0.447 | 0.153   | 0.442   | 0.461   |   |
| C8H11O4N1   | -0.283 | 0.100   | 0.125   | 0.391   |   |

|           |         |         |         |         |   |     |
|-----------|---------|---------|---------|---------|---|-----|
| C8H11O3N1 | -0.295  | 0.192   | 0.223   | 0.301   |   |     |
| C8H10O10  | 0.099   | -0.041  | -0.295  | 0.030   |   |     |
| C8H10O9   | .791**  | -.717*  | -.766*  | -0.595  | 1 |     |
| C8H10O8   | -0.257  | 0.320   | 0.151   | 0.212   |   |     |
| C8H10O7   | -0.113  | 0.093   | 0.285   | -0.025  |   |     |
| C8H10O6   | -0.371  | 0.327   | 0.584   | 0.136   |   |     |
| C8H10O5   | -.897** | .693*   | .797**  | .784*   | 1 | 1   |
| C8H10O4   | -0.238  | 0.424   | 0.187   | 0.098   |   |     |
| C8H10O3   | -0.015  | 0.468   | 0.144   | -0.310  |   |     |
| C8H9O11N1 | .642*   | -0.574  | -.646*  | -0.471  | 1 |     |
| C8H9O10N1 | -0.404  | 0.440   | 0.531   | 0.175   |   |     |
| C8H9O9N1  | -0.517  | .684*   | .702*   | 0.144   | 1 | 1   |
| C8H9O8N1  | -0.488  | 0.297   | 0.554   | 0.390   |   |     |
| C8H9O7N1  | 0.328   | -0.540  | -0.526  | 0.016   |   |     |
| C8H9O6N1  | 0.429   | -0.479  | -0.329  | -0.332  |   |     |
| C8H9O5N1  | 0.036   | 0.303   | 0.084   | -0.279  |   |     |
| C8H9O4N1  | .926**  | -.824** | -.909** | -.696*  | 1 |     |
| C8H8O11   | 0.380   | -0.402  | -0.297  | -0.303  |   |     |
| C8H8O10   | 0.324   | -0.331  | -0.292  | -0.238  |   |     |
| C8H8O9    | 0.141   | 0.060   | 0.091   | -0.353  |   |     |
| C8H8O8    | -0.350  | 0.561   | 0.616   | -0.045  |   |     |
| C8H8O7    | -0.369  | 0.554   | .638*   | -0.021  |   | 1   |
| C8H8O6    | -0.394  | 0.566   | .665*   | 0.003   |   | 1   |
| C8H8O5    | -0.458  | 0.536   | 0.551   | 0.211   |   |     |
| C8H8O4    | 0.314   | 0.236   | -0.120  | -.628*  |   |     |
| C8H7O7N1  | .811**  | -.916** | -.920** | -0.429  | 1 |     |
| C8H7O6N1  | .766*   | -0.423  | -.624*  | -.795** | 1 |     |
| C8H6O10   | -0.192  | 0.488   | 0.463   | -0.200  |   |     |
| C8H6O8    | -0.389  | 0.363   | 0.432   | 0.251   |   |     |
| C8H6O5    | -0.159  | 0.196   | 0.172   | 0.081   |   |     |
| C7H9O10N1 | .670*   | -0.514  | -.698*  | -0.520  | 1 |     |
| C7H9O9N1  | 0.567   | -0.504  | -.622*  | -0.384  |   |     |
| C7H9O8N1  | 0.065   | -0.143  | -0.176  | 0.069   |   |     |
| C7H9O7N1  | 0.258   | -0.410  | -0.444  | 0.025   |   |     |
| C7H9O6N1  | .654*   | -.651*  | -.643*  | -0.456  | 1 |     |
| C7H9O5N1  | -.781*  | 0.606   | .702*   | .676*   |   | 1 1 |
| C7H9O4N1  | -0.585  | 0.465   | 0.571   | 0.472   |   |     |
| C7H9O3N1  | .907**  | -.740*  | -.863** | -.736*  | 1 |     |
| C7H9O1N1  | 0.246   | -0.150  | -0.090  | -0.321  |   |     |
| C7H8O11   | 0.039   | -0.063  | -0.004  | -0.036  |   |     |
| C7H8O10   | -0.207  | 0.167   | 0.261   | 0.126   |   |     |
| C7H8O9    | 0.007   | 0.354   | 0.317   | -0.405  |   |     |
| C7H8O8    | -0.572  | 0.577   | .777*   | 0.255   |   | 1   |
| C7H8O7    | -0.453  | 0.445   | 0.615   | 0.208   |   |     |

|           |         |         |         |         |  |   |   |
|-----------|---------|---------|---------|---------|--|---|---|
| C7H8O6    | -0.588  | 0.586   | .775*   | 0.281   |  |   | 1 |
| C7H8O5    | -.842** | .742*   | .840**  | .629*   |  | 1 | 1 |
| C7H8O4    | 0.215   | 0.044   | -0.181  | -0.304  |  |   |   |
| C7H8O3    | .691*   | -0.432  | -.716*  | -0.591  |  | 1 |   |
| C7H7O9N1  | 0.112   | 0.035   | -0.201  | -0.094  |  |   |   |
| C7H7O8N1  | -0.490  | .639*   | .645*   | 0.157   |  | 1 | 1 |
| C7H7O7N1  | 0.619   | -.648*  | -.627*  | -0.402  |  |   |   |
| C7H7O6N1  | -0.543  | 0.498   | .632*   | 0.335   |  |   | 1 |
| C7H7O5N1  | .956**  | -.744*  | -.858** | -.828** |  | 1 |   |
| C7H7O4N1  | .934**  | -.749*  | -.877** | -.771*  |  | 1 |   |
| C7H7O3N1  | -.814** | .746*   | .816**  | 0.589   |  |   | 1 |
| C7H6O11   | -0.073  | -0.202  | 0.123   | 0.160   |  |   |   |
| C7H6O10   | -0.388  | 0.485   | 0.509   | 0.135   |  |   |   |
| C7H6O8    | -0.204  | 0.500   | 0.368   | -0.122  |  |   |   |
| C7H6O7    | -.768*  | 0.479   | .779*   | .669*   |  |   | 1 |
| C7H6O6    | 0.173   | 0.178   | 0.141   | -0.505  |  |   |   |
| C7H6O5    | -0.331  | 0.449   | 0.514   | 0.044   |  |   |   |
| C7H6O4    | -0.570  | .836**  | 0.604   | 0.229   |  |   | 1 |
| C6H9O11N1 | .913**  | -.864** | -.882** | -.669*  |  | 1 |   |
| C6H9O10N1 | .831**  | -0.579  | -.775*  | -.736*  |  | 1 |   |
| C6H9O9N1  | .748*   | -.625*  | -.728*  | -0.588  |  | 1 |   |
| C6H9O8N1  | 0.276   | -0.453  | -0.288  | -0.089  |  |   |   |
| C6H9O7N1  | 0.466   | -0.569  | -0.587  | -0.185  |  |   |   |
| C6H9O6N1  | 0.092   | -0.267  | -0.255  | 0.135   |  |   |   |
| C6H9O5N1  | 0.162   | -0.301  | -0.216  | -0.002  |  |   |   |
| C6H9O4N1  | -.630*  | 0.421   | 0.521   | 0.610   |  |   |   |
| C6H9O3N1  | -0.382  | 0.379   | 0.388   | 0.258   |  |   |   |
| C6H9O2N1  | 0.171   | -0.134  | -0.330  | -0.032  |  |   |   |
| C6H8O10   | -.947** | .835**  | .890**  | .743*   |  | 1 | 1 |
| C6H8O9    | 0.585   | -0.237  | -0.497  | -.638*  |  |   |   |
| C6H8O8    | 0.165   | 0.248   | -0.064  | -0.394  |  |   |   |
| C6H8O7    | -0.134  | 0.346   | 0.386   | -0.184  |  |   |   |
| C6H8O6    | -0.517  | 0.443   | .690*   | 0.279   |  |   | 1 |
| C6H8O5    | -0.555  | 0.479   | .653*   | 0.356   |  |   | 1 |
| C6H8O4    | -0.610  | 0.619   | .657*   | 0.381   |  |   | 1 |
| C6H8O3    | 0.361   | 0.059   | -0.232  | -0.548  |  |   |   |
| C6H8O2    | 0.459   | -0.012  | -0.330  | -.630*  |  |   |   |
| C6H7O11N1 | 0.405   | -0.366  | -0.481  | -0.247  |  |   |   |
| C6H7O10N1 | 0.315   | -0.199  | -0.277  | -0.301  |  |   |   |
| C6H7O9N1  | .710*   | -.626*  | -.727*  | -0.517  |  | 1 |   |
| C6H7O8N1  | 0.510   | -0.460  | -0.528  | -0.363  |  |   |   |
| C6H7O7N1  | -0.393  | 0.103   | 0.146   | 0.581   |  |   |   |
| C6H7O6N1  | 0.057   | -0.111  | 0.150   | -0.147  |  |   |   |
| C6H7O5N1  | -.799** | .661*   | .812**  | 0.609   |  | 1 | 1 |



|           |         |        |         |        |  |   |     |
|-----------|---------|--------|---------|--------|--|---|-----|
| C6H7O4N1  | -0.467  | 0.476  | 0.465   | 0.315  |  |   |     |
| C6H7O3N1  | -0.425  | 0.538  | 0.454   | 0.212  |  |   |     |
| C6H6O10   | -0.238  | 0.372  | 0.417   | -0.024 |  |   |     |
| C6H6O9    | -.781*  | 0.613  | .811**  | 0.601  |  | 1 |     |
| C6H6O8    | -.691*  | .671*  | .802**  | 0.409  |  | 1 | 1   |
| C6H6O7    | -0.354  | 0.391  | 0.476   | 0.143  |  |   |     |
| C6H6O6    | -.684*  | .728*  | .873**  | 0.320  |  | 1 | 1   |
| C6H6O5    | -0.618  | .653*  | .687*   | 0.359  |  | 1 | 1   |
| C6H6O4    | -0.196  | 0.422  | 0.307   | -0.056 |  |   |     |
| C6H6O3    | 0.246   | 0.099  | -0.147  | -0.413 |  |   |     |
| C6H6O2    | -0.254  | 0.513  | 0.338   | -0.017 |  |   |     |
| C6H5O9N1  | 0.361   | -0.239 | -0.238  | -0.390 |  |   |     |
| C6H5O7N1  | -.822** | 0.609  | .808**  | .681*  |  | 1 | 1   |
| C6H5O6N1  | -0.235  | 0.127  | 0.393   | 0.113  |  |   |     |
| C6H5O5N1  | .753*   | -0.594 | -.722*  | -0.617 |  | 1 |     |
| C6H5O4N1  | .939**  | -.779* | -.884** | -.761* |  | 1 |     |
| C6H5O3N1  | -0.015  | 0.255  | -0.066  | -0.061 |  |   |     |
| C6H5O2N1  | 0.230   | 0.110  | -0.190  | -0.360 |  |   |     |
| C6H5N1    | 0.046   | -0.001 | 0.035   | -0.108 |  |   |     |
| C6H4O9    | -0.414  | 0.536  | 0.487   | 0.172  |  |   |     |
| C6H4O8    | -0.245  | 0.307  | 0.387   | 0.042  |  |   |     |
| C6H4O7    | -0.532  | 0.257  | 0.605   | 0.459  |  |   |     |
| C6H4O6    | 0.026   | 0.226  | 0.137   | -0.255 |  |   |     |
| C6H4O5    | -0.526  | .708*  | .752*   | 0.116  |  |   | 1   |
| C6H4O4    | 0.558   | -0.203 | -0.384  | -.680* |  |   |     |
| C5H7O10N1 | -0.484  | 0.354  | 0.339   | 0.492  |  |   |     |
| C5H7O9N1  | 0.176   | 0.062  | -0.125  | -0.278 |  |   |     |
| C5H7O8N1  | .946**  | -.786* | -.914** | -.750* |  | 1 |     |
| C5H7O7N1  | -0.092  | -0.002 | -0.150  | 0.270  |  |   |     |
| C5H7O6N1  | 0.423   | -0.453 | -0.403  | -0.285 |  |   |     |
| C5H7O5N1  | -0.562  | 0.357  | 0.603   | 0.463  |  |   |     |
| C5H7O4N1  | -0.554  | 0.418  | 0.514   | 0.475  |  |   |     |
| C5H7O3N1  | 0.364   | -0.235 | -0.320  | -0.344 |  |   |     |
| C5H7O2N1  | 0.105   | 0.047  | -0.056  | -0.182 |  |   |     |
| C5H6O9    | -0.135  | 0.285  | 0.286   | -0.085 |  |   |     |
| C5H6O8    | 0.001   | 0.431  | 0.126   | -0.308 |  |   |     |
| C5H6O7    | -0.463  | 0.620  | .689*   | 0.088  |  |   | 1   |
| C5H6O6    | -.672*  | 0.530  | .786*   | 0.459  |  |   | 1   |
| C5H6O5    | -0.469  | 0.485  | .636*   | 0.203  |  |   | 1   |
| C5H6O4    | -0.424  | 0.476  | 0.424   | 0.263  |  |   |     |
| C5H6O3    | 0.102   | 0.232  | 0.039   | -0.335 |  |   |     |
| C5H5O9N1  | 0.197   | -0.271 | -0.305  | -0.024 |  |   |     |
| C5H5O8N1  | .696*   | -0.429 | -0.558  | -.704* |  | 1 |     |
| C5H5O7N1  | -.894** | .764*  | .840**  | .713*  |  | 1 | 1 1 |

|          |         |        |         |         |   |   |   |
|----------|---------|--------|---------|---------|---|---|---|
| C5H5O6N1 | -.877** | .648*  | .772*   | .787*   | 1 | 1 | 1 |
| C5H5O5N1 | -.722*  | 0.615  | .860**  | 0.458   |   | 1 |   |
| C5H5O4N1 | -.691*  | .669*  | .759*   | 0.440   | 1 | 1 |   |
| C5H5O3N1 | -.655*  | .693*  | .731*   | 0.377   | 1 | 1 |   |
| C5H5O2N1 | -0.326  | 0.477  | 0.416   | 0.085   |   |   |   |
| C5H4O9   | -0.337  | 0.358  | 0.480   | 0.126   |   |   |   |
| C5H4O8   | -0.408  | .647*  | 0.531   | 0.074   | 1 |   |   |
| C5H4O7   | -0.178  | 0.305  | 0.130   | 0.086   |   |   |   |
| C5H4O5   | -0.447  | 0.435  | 0.601   | 0.211   |   |   |   |
| C5H4O4   | -0.345  | 0.576  | 0.452   | 0.046   |   |   |   |
| C5H4O3   | 0.371   | -0.001 | -0.296  | -0.495  |   |   |   |
| C5H4O1   | -.676*  | 0.317  | 0.436   | .806**  |   |   | 1 |
| C4H7O8N1 | .781*   | -0.471 | -.678*  | -.763*  | 1 |   |   |
| C4H7O7N1 | .934**  | -.719* | -.855** | -.801** | 1 |   |   |
| C4H7O6N1 | 0.178   | 0.037  | -0.233  | -0.197  |   |   |   |
| C4H7O5N1 | -0.613  | 0.463  | .739*   | 0.414   |   | 1 |   |
| C4H7O4N1 | -0.320  | 0.237  | 0.249   | 0.309   |   |   |   |
| C4H7O3N1 | -0.254  | 0.330  | 0.255   | 0.133   |   |   |   |
| C4H7O1N1 | -0.106  | -0.001 | 0.212   | 0.059   |   |   |   |
| C4H6O8   | -0.160  | 0.463  | 0.153   | -0.044  |   |   |   |
| C4H6O7   | -0.268  | 0.521  | 0.365   | -0.013  |   |   |   |
| C4H6O6   | -0.205  | 0.375  | 0.514   | -0.151  |   |   |   |
| C4H6O5   | -0.563  | .628*  | .748*   | 0.229   | 1 | 1 |   |
| C4H6O4   | -0.183  | 0.378  | 0.262   | -0.028  |   |   |   |
| C4H6O3   | 0.027   | 0.181  | 0.074   | -0.193  |   |   |   |
| C4H6O2   | -.722*  | 0.313  | 0.468   | .872**  |   |   | 1 |
| C4H6O1   | -.717*  | 0.491  | .677*   | .632*   |   | 1 | 1 |
| C4H5O9N1 | 0.102   | 0.065  | -0.008  | -0.219  |   |   |   |
| C4H5O8N1 | -.808** | .632*  | .879**  | 0.598   | 1 | 1 |   |
| C4H5O7N1 | 0.390   | -0.468 | -0.400  | -0.219  |   |   |   |
| C4H5O6N1 | -0.548  | 0.099  | 0.431   | .685*   |   |   | 1 |
| C4H5O5N1 | -.874** | .653*  | .876**  | .711*   | 1 | 1 | 1 |
| C4H5O4N1 | -0.558  | 0.542  | 0.621   | 0.348   |   |   |   |
| C4H5O2N1 | -0.472  | 0.601  | 0.482   | 0.249   |   |   |   |
| C4H4O9   | -0.516  | 0.266  | 0.447   | 0.528   |   |   |   |
| C4H4O8   | -0.420  | 0.259  | 0.396   | 0.386   |   |   |   |
| C4H4O7   | -0.083  | 0.422  | 0.065   | -0.107  |   |   |   |
| C4H4O6   | -.636*  | 0.418  | .714*   | 0.496   |   | 1 |   |
| C4H4O5   | -0.574  | 0.508  | .754*   | 0.309   |   | 1 |   |
| C4H4O4   | -0.521  | 0.591  | 0.615   | 0.258   |   |   |   |
| C4H4O2   | -0.068  | 0.041  | 0.133   | 0.019   |   |   |   |
| C4H4O1   | -.714*  | 0.495  | .675*   | .627*   |   | 1 | 1 |
| C3H5O9N1 | 0.329   | -0.169 | -0.186  | -0.401  |   |   |   |
| C3H5O8N1 | 0.485   | -0.283 | -0.543  | -0.398  |   |   |   |

|          |         |        |        |        |   |   |
|----------|---------|--------|--------|--------|---|---|
| C3H5O7N1 | -.865** | 0.574  | .768*  | .806** | 1 | 1 |
| C3H5O6N1 | -0.105  | -0.275 | -0.105 | 0.407  |   |   |
| C3H5O5N1 | 0.237   | -0.017 | -0.148 | -0.334 |   |   |
| C3H5O4N1 | -0.140  | 0.077  | 0.154  | 0.119  |   |   |
| C3H5O3N1 | -0.189  | 0.374  | 0.232  | 0.005  |   |   |
| C3H5O2N1 | -0.322  | 0.403  | 0.369  | 0.147  |   |   |
| C3H4O8   | -.805** | .685*  | .869** | 0.570  | 1 | 1 |
| C3H4O7   | -.694*  | 0.455  | .666*  | 0.616  |   | 1 |
| C3H4O6   | -0.362  | 0.557  | 0.488  | 0.063  |   |   |
| C3H4O5   | -0.475  | 0.320  | .642*  | 0.296  |   | 1 |
| C3H4O4   | -0.392  | 0.237  | 0.341  | 0.381  |   |   |
| C3H4O3   | 0.249   | 0.023  | -0.101 | -0.408 |   |   |
| C3H4O2   | -.650*  | 0.407  | 0.578  | 0.618  |   |   |
| C2H4O4   | -0.102  | 0.169  | 0.143  | 0.007  |   |   |
| C2H4O3   | -0.065  | 0.316  | 0.173  | -0.157 |   |   |
| C2H4O2   | -0.128  | 0.047  | 0.193  | 0.087  |   |   |

Pearson's correlation coefficient (1-sided t test), \*\*:  $p < 0.01$ , \*:  $p < 0.05$

95 **Table S11. Average properties of molecules associated with four characteristic chromophores in winter**

| Average properties                      | Molecular mass<br>[g mol <sup>-1</sup> ] | O/C ratio  | DBE        | $AI_{mod}$  | Mass fraction of<br>potential BrC [%] | Mass fraction of<br>nitrogen containing<br>molecules [%] |
|-----------------------------------------|------------------------------------------|------------|------------|-------------|---------------------------------------|----------------------------------------------------------|
| LO-HULIS (C1)                           | 265 ± 2                                  | 0.8 ± 0.01 | 5.8 ± 0.04 | 0.23 ± 0.02 | 17 ± 4                                | 62 ± 1                                                   |
| HO-HULIS-1 (C2)                         | 170 ± 1                                  | 0.9 ± 0.01 | 3.6 ± 0.03 | 0.16 ± 0.01 | 14 ± 2                                | 9 ± 0.3                                                  |
| HO-HULIS-2 (C3)                         | 166 ± 1                                  | 1.0 ± 0.02 | 3.4 ± 0.02 | 0.10 ± 0.01 | 34 ± 4                                | 9 ± 0.3                                                  |
| Phenol- and<br>naphthalene-like<br>(C4) | 163 ± 8                                  | 0.8 ± 0.03 | 3.8 ± 0.06 | 0.20 ± 0.03 | 5 ± 1                                 | 32 ± 2                                                   |

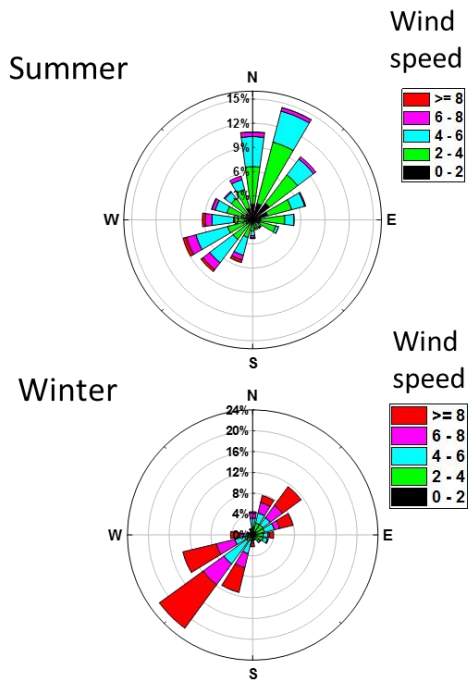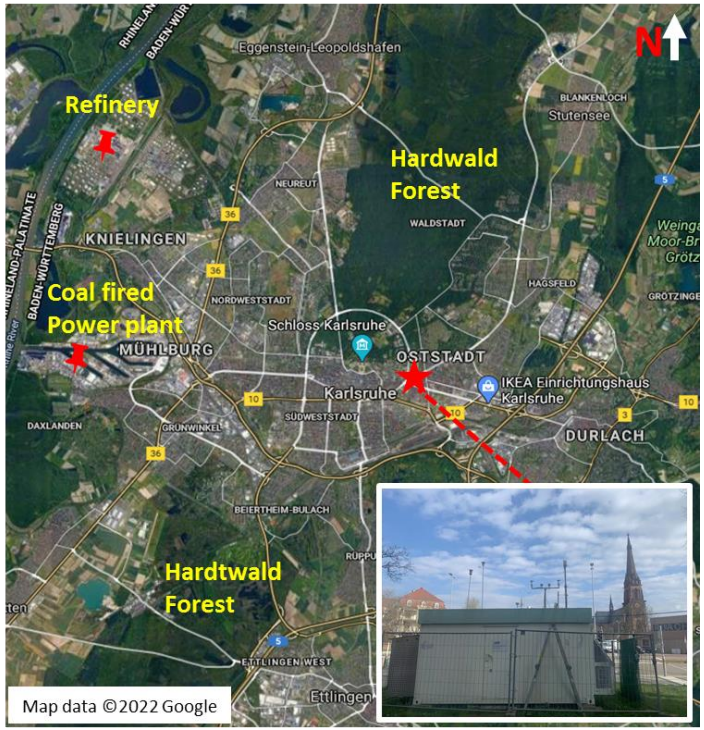

100 **Figure S1.** Wind roses (left) pattern, and measurement location map and container picture (right) pattern. Background map courtesy of © Google Maps.

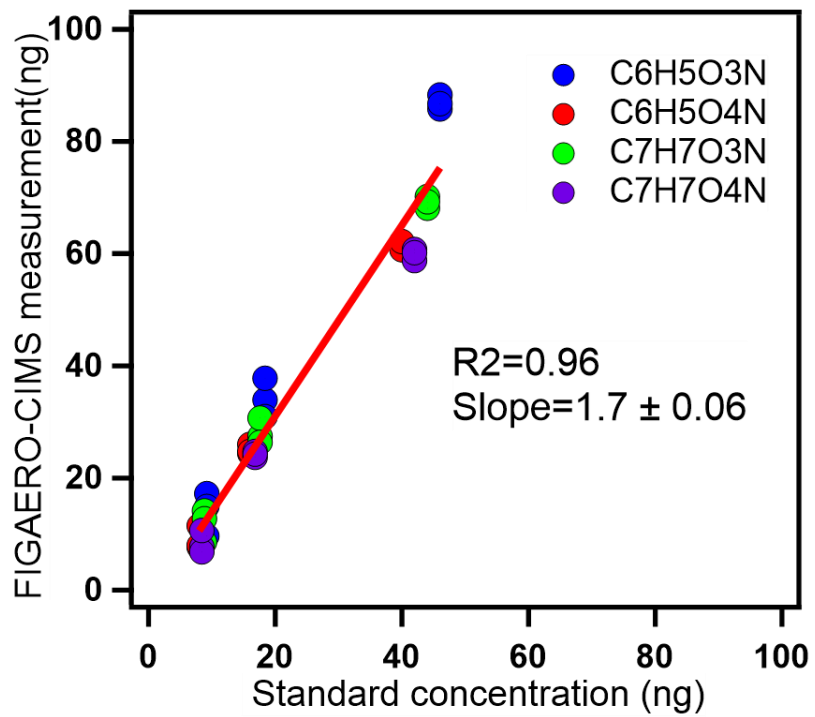

Figure S2. A calibration of FIGAERO-CIMS with NACs. Blue: C6H5O3N; Red: C6H5O4N; Green: C7H7O3N; Purple: C7H7O4N.

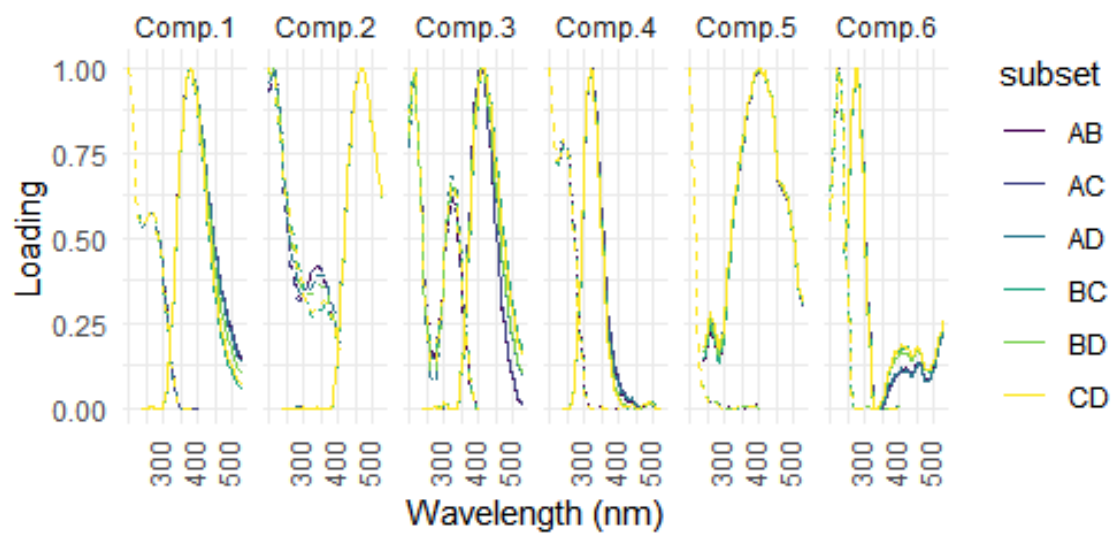

105

Figure S3. Split analysis of 6 component PARAFAC model with the split style ‘S<sub>4</sub>C<sub>6</sub>T<sub>3</sub>’ for all EEMs. The data are split into four subsets (A, B, C, and D) and recombined to compare one-half of the data to the other in different combinations (AB-CD, AD-BC, AC-DB) (Pucher et al., 2019).

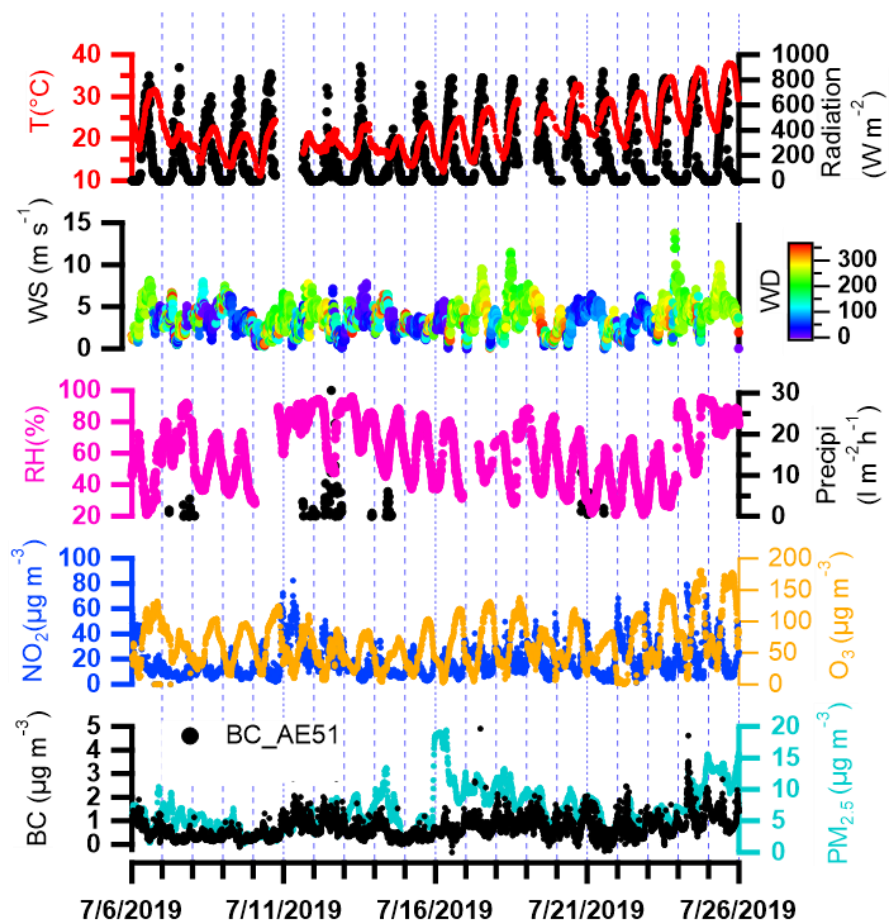

110 Figure S4. Overview of the meteorological parameters: temperature (T), radiation, wind speed (WS), wind direction (WD), relative humidity (RH), precipitation (Precipi), trace gases ( $\text{NO}_2$  and  $\text{O}_3$ ), black carbon (BC), and  $\text{PM}_{2.5}$  in summer.



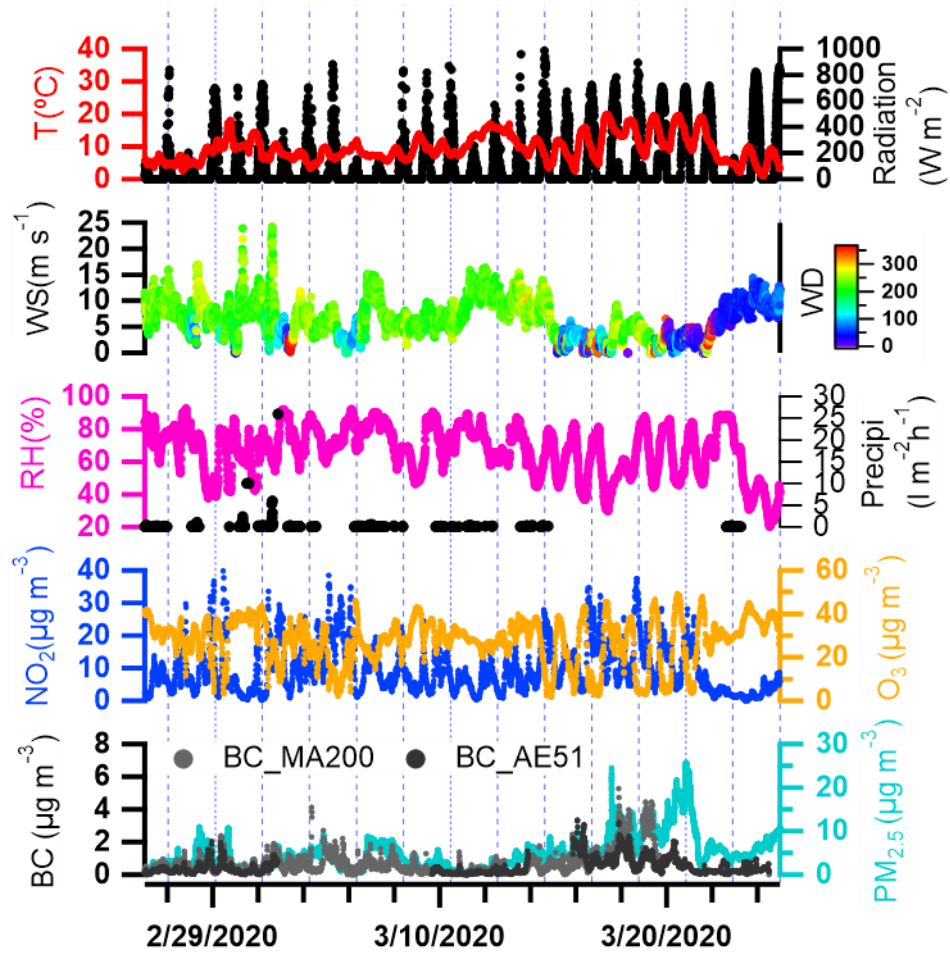

115 Figure S5. Overview of the meteorological parameters: temperature (T), radiation, windspeeds (WS), wind direction (WD), relative humidity (RH), precipitation (Precipi), trace gases (NO<sub>2</sub> and O<sub>3</sub>), black carbon (BC), and PM<sub>2.5</sub> in winter.

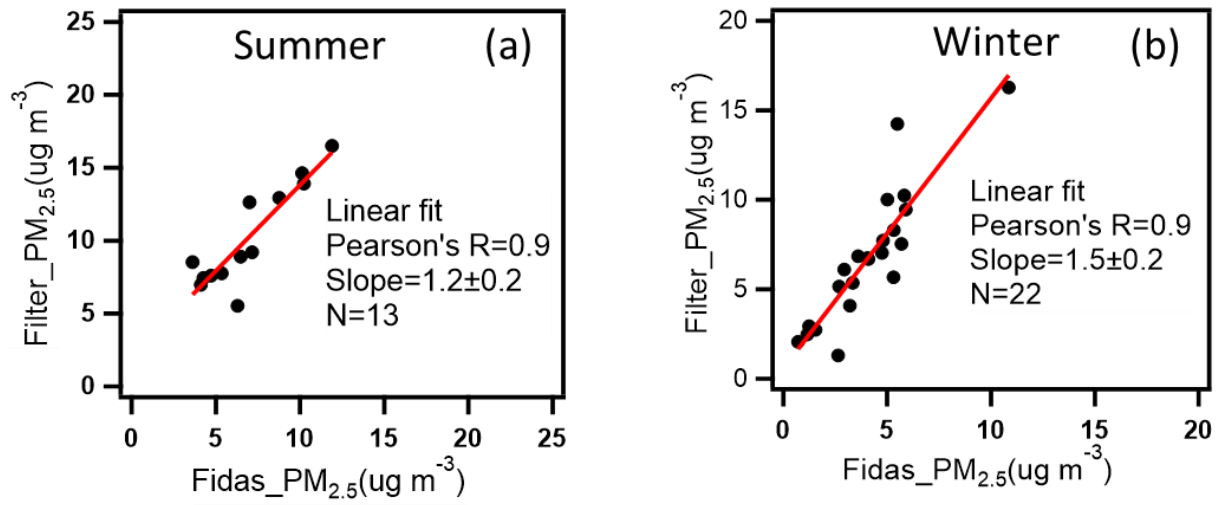

Figure S6. Linear correlation of PM<sub>2.5</sub> mass concentrations from gravimetric analysis of filter and Fidas-OPC in summer (a) and winter (b).

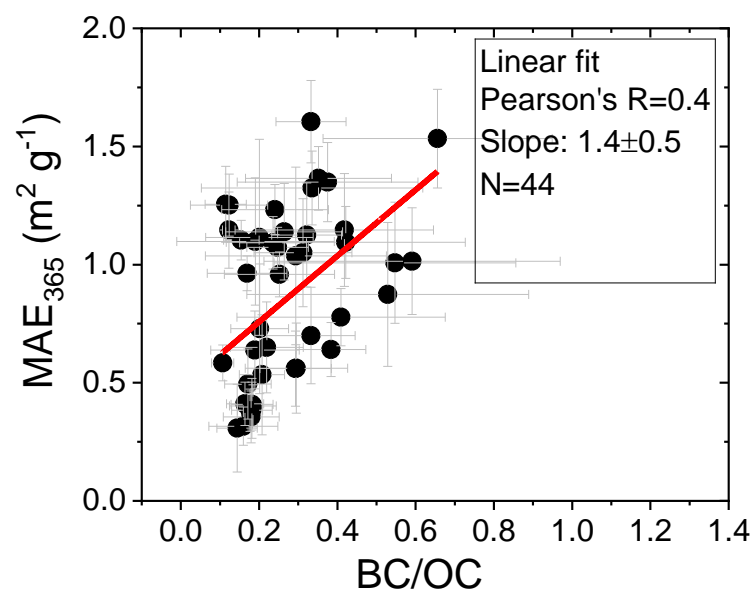

120

Figure S7. Linear correlation between the MAE<sub>365</sub> and the BC/OC ratio.

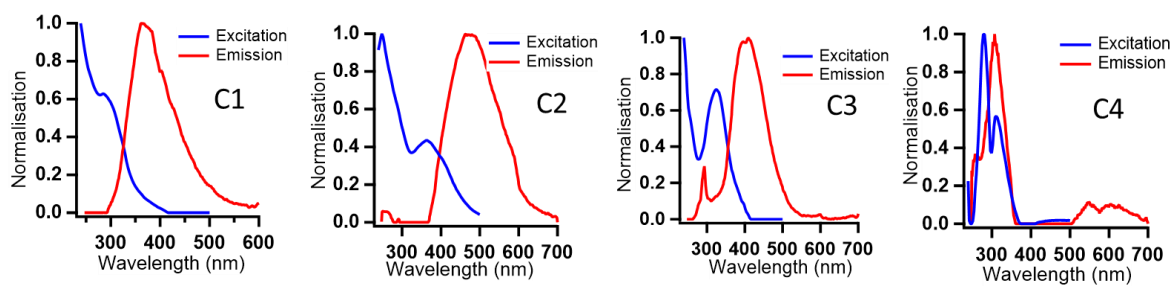

Figure S8. Normalization of spectral loading of C1, C2, C3, and C4.

125

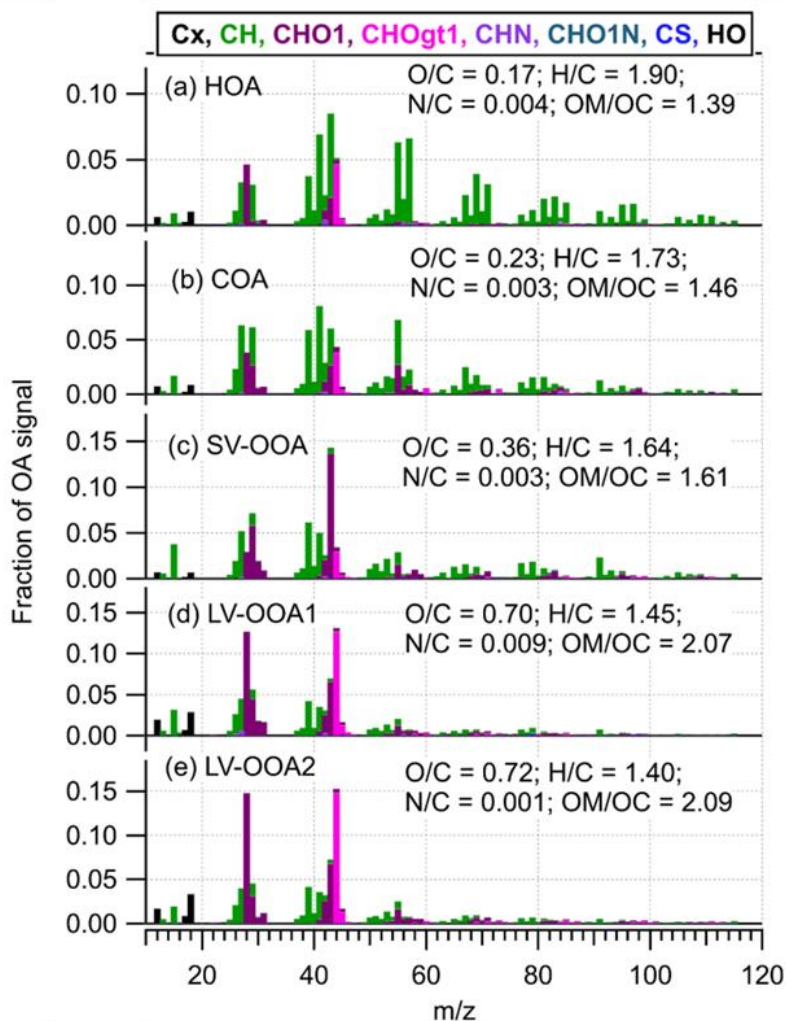

Figure S9. Mass spectra of five PMF-resolved organic aerosol (OA) factors at Durlacher Tor, Karlsruhe in summer 2019. HOA = hydrocarbon-like OA; COA = cooking-related OA; SV-OOA = semi-volatile oxidized OA and LV-OOA = low-volatile oxygenated OA (LV-OOA1 and LV-OOA2).

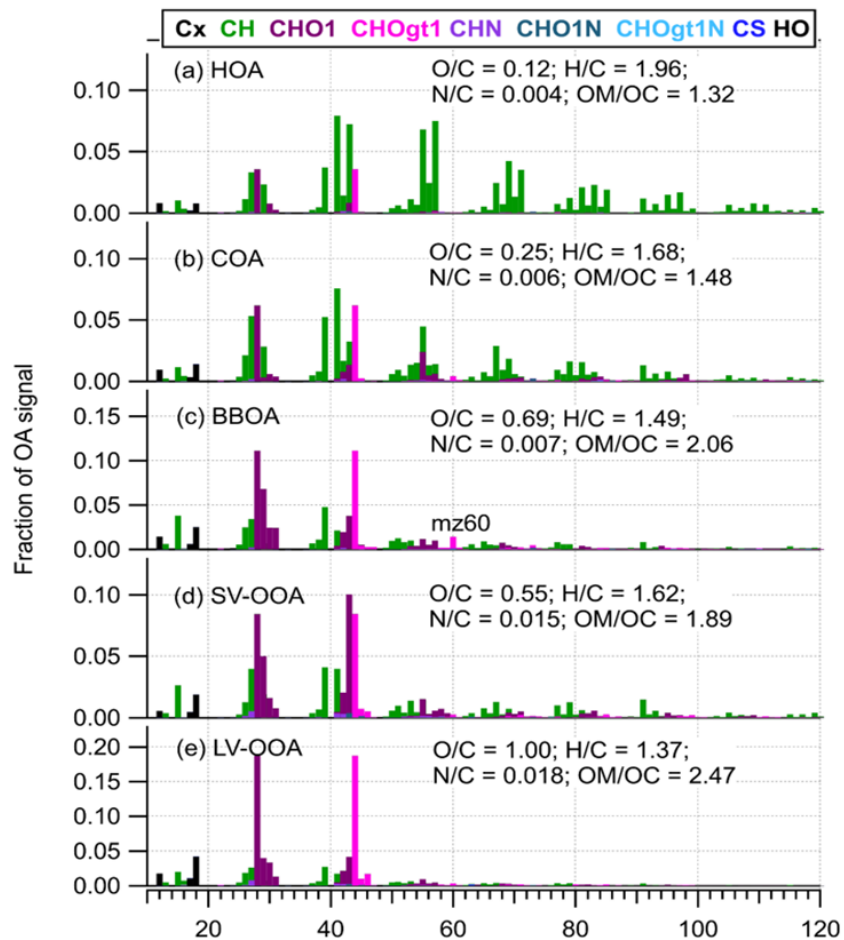

Figure S10. Mass spectra of five PMF-resolved organic aerosol (OA) factors at Durlacher Tor, Karlsruhe in winter 2020. HOA = hydrocarbon-like OA; COA = cooking-related OA; BBOA = biomass burning-related OA; SV-OOA = semi-volatile oxygenated OA; LV-OOA = low-volatile oxygenated OA.

135

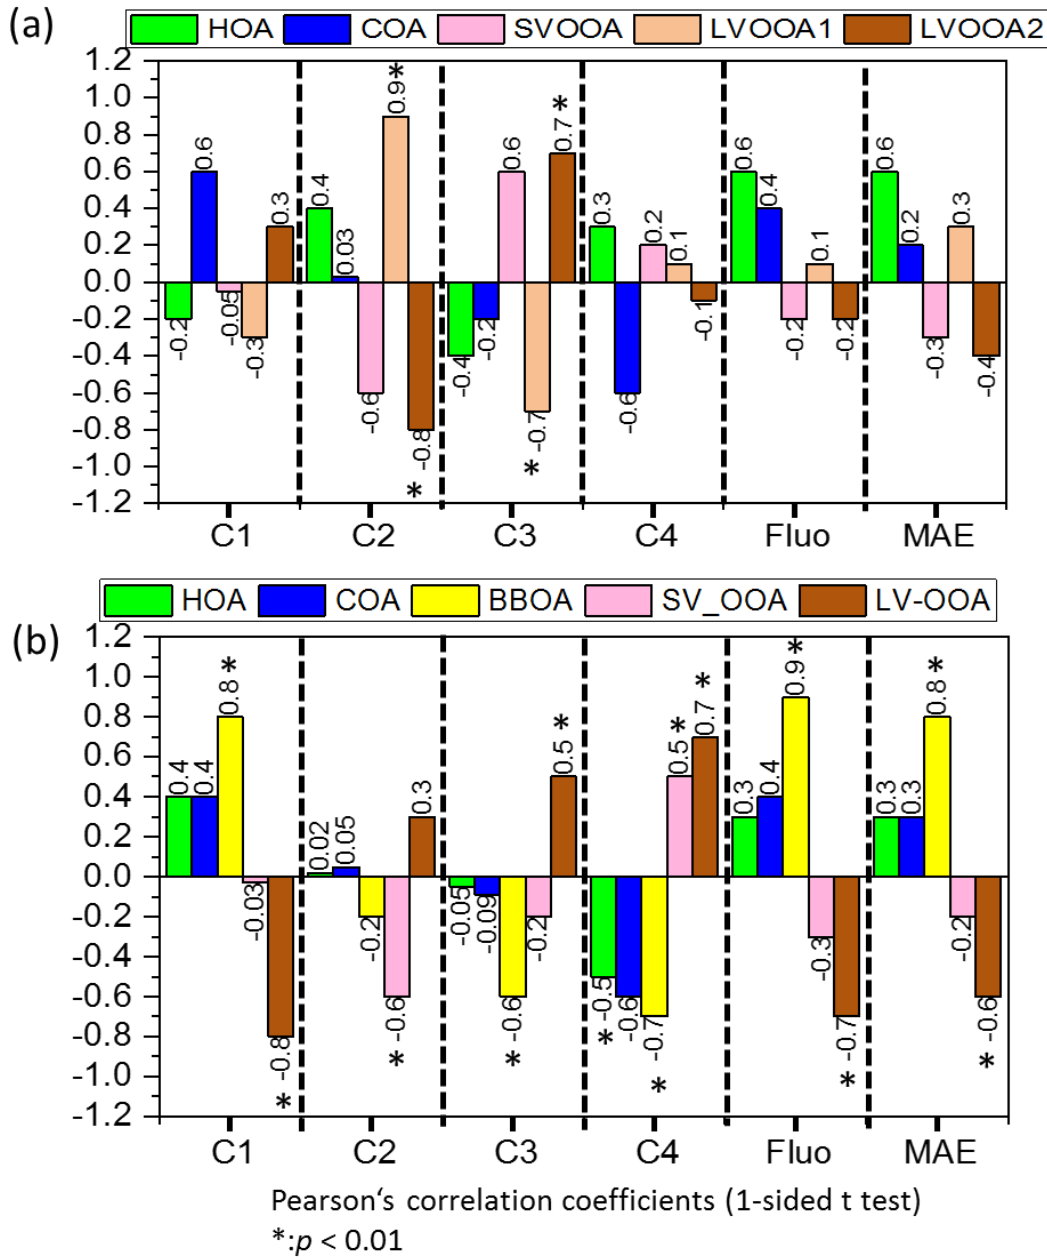

140 Figure S11. Pearson's correlation coefficients and significance levels ( $p$ , 1-sided t test) of chromophore components and AMS-PMF factors. a: summer ( $n = 11$ ), b: winter ( $n = 30$ ).

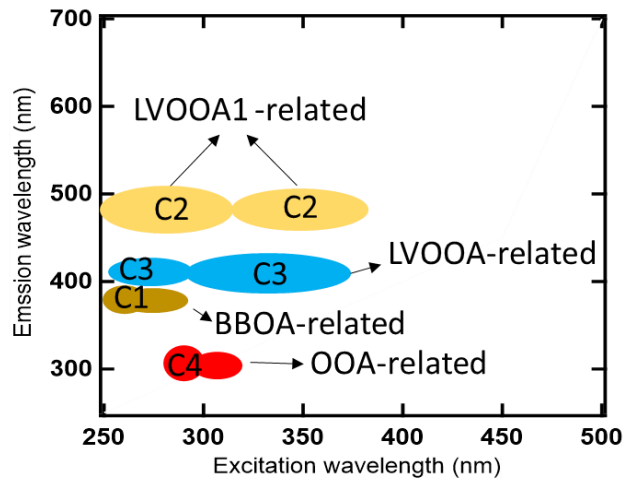

Figure S12. Diagram of the association of the EEM profiles with AMS-PMF factors.



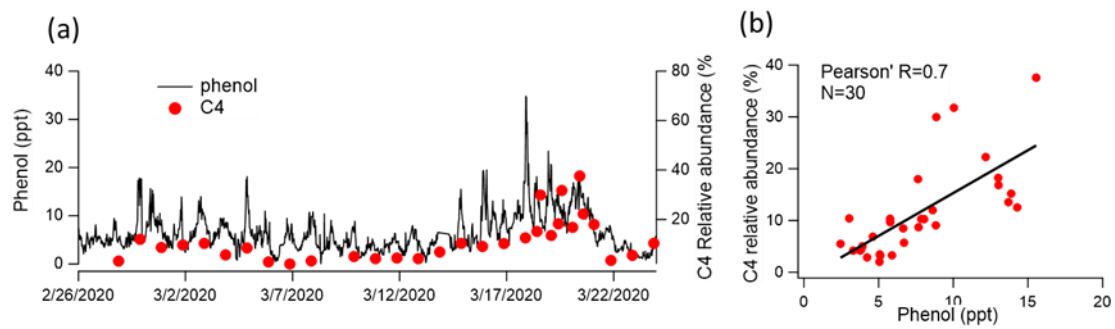

**Figure S13. Time series of phenol in gas phase and component 4 (C4) in particle phase (a). Correlation analysis of C4 and phenol (b).**

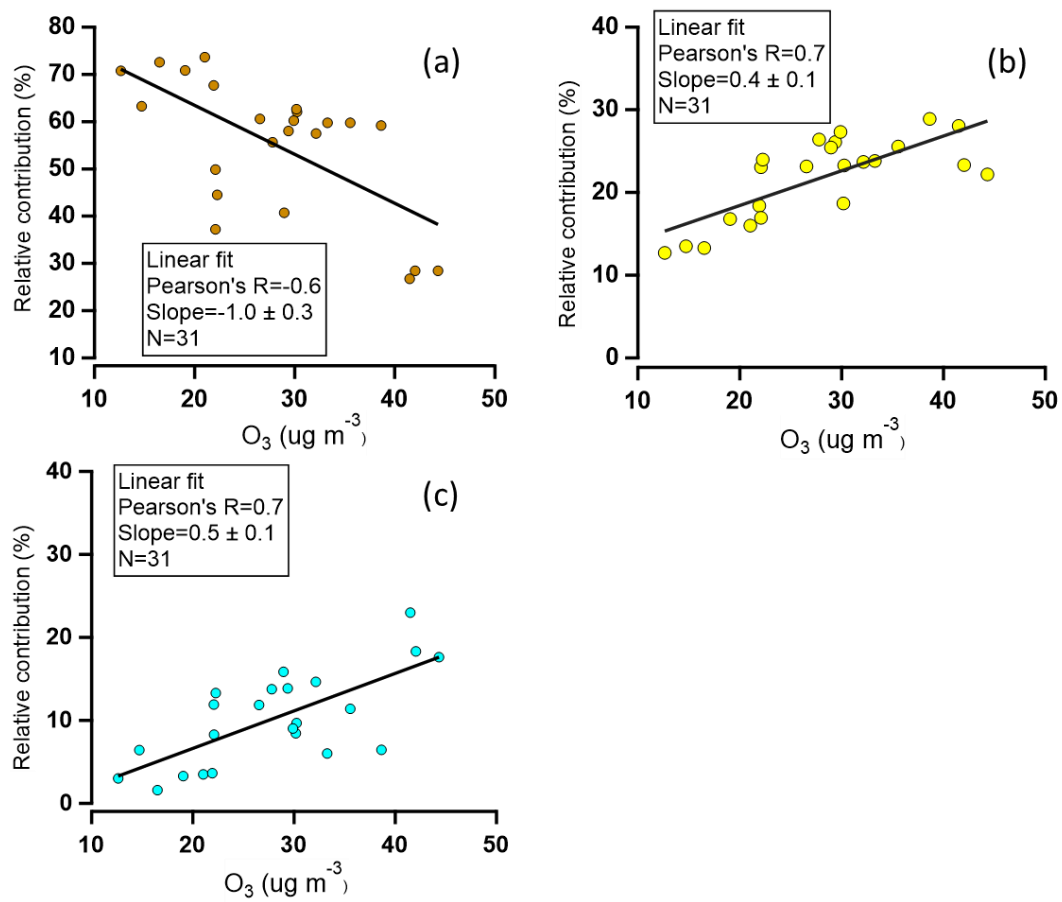

Figure S14. The linear correlations between chromophore components with  $O_3$ , LO-HULIS (a), HO-HULIS-1 (b), and HO-HULIS-2 (c).

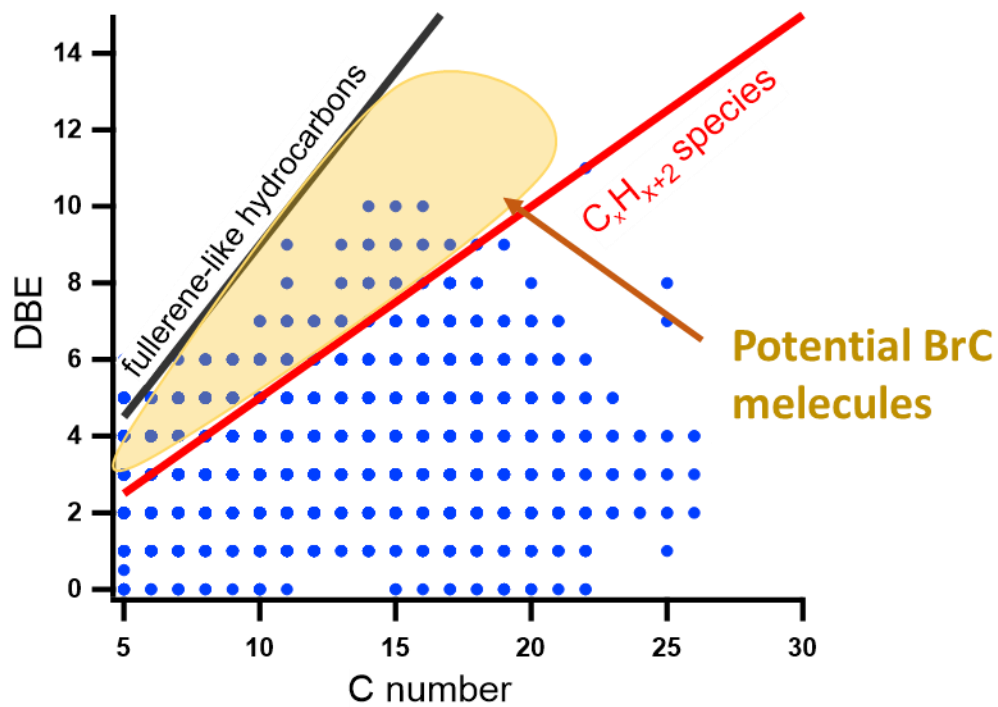

155

Figure S15. The plot of the double bond equivalent (DBE) vs a number of carbon atoms according to our measurements following the procedure described by Lin et al. (2018). The lines indicate DBE reference values of linear conjugated polyenes  $C_xH_{x+2}$  (red solid line) and fullerene-like hydrocarbons with  $DBE=0.9*c$  (black solid line). Data points inside the yellow shaded area are potential BrC molecules. (cf. Lin et al. 2018).

160

## References

- 165 Canagaratna, M. R., Jimenez, J. L., Kroll, J. H., Chen, Q., Kessler, S. H., Massoli, P., Hildebrandt Ruiz, L., Fortner, E., Williams, L. R., Wilson, K. R., Surratt, J. D., Donahue, N. M., Jayne, J. T., and Worsnop, D. R.: Elemental ratio measurements of organic compounds using aerosol mass spectrometry: characterization, improved calibration, and implications, *Atmospheric Chemistry and Physics*, 15, 253-272, 10.5194/acp-15-253-2015, 2015.
- 170 Chen, Q. C., Miyazaki, Y., Kawamura, K., Matsumoto, K., Coburn, S., Volkamer, R., Iwamoto, Y., Kagami, S., Deng, Y. G., Ogawa, S., Ramasamy, S., Kato, S., Ida, A., Kajii, Y., and Mochida, M.: Characterization of Chromophoric Water-Soluble Organic Matter in Urban, Forest, and Marine Aerosols by HR-ToF-AMS Analysis and Excitation Emission Matrix Spectroscopy, *Environ. Sci. Technol.*, 50, 10351-10360, 10.1021/acs.est.6b01643, 2016.
- Daumit, K. E., Kessler, S. H., and Kroll, J. H.: Average chemical properties and potential formation pathways of highly oxidized organic aerosol, *Faraday Discussions*, 165, 181-202, 10.1039/c3fd00045a, 2013.
- 175 Lin, P., Fleming, L. T., Nizkorodov, S. A., Laskin, J., and Laskin, A.: Comprehensive Molecular Characterization of Atmospheric Brown Carbon by High Resolution Mass Spectrometry with Electrospray and Atmospheric Pressure Photoionization, *Analytical Chemistry*, 90, 12493-12502, 10.1021/acs.analchem.8b02177, 2018.
- Linke, C., Ibrahim, I., Schleicher, N., Hitzenberger, R., Andreae, M. O., Leisner, T., and Schnaiter, M.: A novel single-cavity three-wavelength photoacoustic spectrometer for atmospheric aerosol research, *Atmospheric Measurement Techniques*, 9, 5331-5346, 10.5194/amt-9-5331-2016, 2016.
- 180 Lopez-Hilfiker, F. D., Mohr, C., Ehn, M., Rubach, F., Kleist, E., Wildt, J., Mentel, T. F., Lutz, A., Hallquist, M., Worsnop, D., and Thornton, J. A.: A novel method for online analysis of gas and particle composition: description and evaluation of a Filter Inlet for Gases and AEROSols (FIGAERO), *Atmospheric Measurement Techniques*, 7, 983-1001, 10.5194/amt-7-983-2014, 2014.
- 185 Lopez-Hilfiker, F. D., Iyer, S., Mohr, C., Lee, B. H., D'Ambro, E. L., Kurten, T., and Thornton, J. A.: Constraining the sensitivity of iodide adduct chemical ionization mass spectrometry to multifunctional organic molecules using the collision limit and thermodynamic stability of iodide ion adducts, *Atmospheric Measurement Techniques*, 9, 1505-1512, 10.5194/amt-9-1505-2016, 2016.
- Matos, J. T. V., Freire, S., Duarte, R., and Duarte, A. C.: Natural organic matter in urban aerosols: Comparison between water and alkaline soluble components using excitation-emission matrix fluorescence spectroscopy and multiway data analysis, *Atmospheric Environment*, 102, 1-10, 10.1016/j.atmosenv.2014.11.042, 2015.
- 190 Moschos, V., Kumar, N. K., Daellenbach, K. R., Baltensperger, U., Prevot, A. S. H., and El Haddad, I.: Source Apportionment of Brown Carbon Absorption by Coupling Ultraviolet-Visible Spectroscopy with Aerosol Mass Spectrometry, *Environmental Science & Technology Letters*, 5, 302-+, 10.1021/acs.estlett.8b00118, 2018.

- Pucher, M., Wunsch, U., Weigelhofer, G., Murphy, K., Hein, T., and Graeber, D.: staRdom: Versatile Software for Analyzing Spectroscopic Data of Dissolved Organic Matter in R, *Water*, 11, 10.3390/w11112366, 2019.
- 195 Song, J. W., Saathoff, H., Gao, L. Y., Gebhardt, R., Jiang, F., Vallon, M., Bauer, J., Norra, S., and Leisner, T.: Variations of PM<sub>2.5</sub> sources in the context of meteorology and seasonality at an urban street canyon in Southwest Germany, *Atmospheric Environment*, 282, 10.1016/j.atmosenv.2022.119147, 2022.
- Tang, J., Li, J., Su, T., Han, Y., Mo, Y. Z., Jiang, H. X., Cui, M., Jiang, B., Chen, Y. J., Tang, J. H., Song, J. Z., Peng, P. A., and Zhang, G.: Molecular compositions and optical properties of dissolved brown carbon in biomass burning, coal combustion, and vehicle emission aerosols illuminated by excitation-emission matrix spectroscopy and Fourier transform ion cyclotron resonance mass spectrometry analysis, *Atmospheric Chemistry and Physics*, 20, 2513-2532, 10.5194/acp-20-2513-2020, 2020.
- 200 Teich, M., van Pinxteren, D., Wang, M., Kecorius, S., Wang, Z. B., Muller, T., Mocnik, G., and Herrmann, H.: Contributions of nitrated aromatic compounds to the light absorption of water-soluble and particulate brown carbon in different atmospheric environments in Germany and China, *Atmospheric Chemistry and Physics*, 17, 1653-1672, 10.5194/acp-17-1653-2017, 2017.
- 205 Ulbrich, I. M., Canagaratna, M. R., Zhang, Q., Worsnop, D. R., and Jimenez, J. L.: Interpretation of organic components from Positive Matrix Factorization of aerosol mass spectrometric data, *Atmospheric Chemistry and Physics*, 9, 2891-2918, 10.5194/acp-9-2891-2009, 2009.
- 210 Xie, M. J., Zhao, Z. Z., Holder, A. L., Hays, M. D., Chen, X., Shen, G. F., Jetter, J. J., Champion, W. M., and Wang, Q. G.: Chemical composition, structures, and light absorption of N-containing aromatic compounds emitted from burning wood and charcoal in household cookstoves, *Atmospheric Chemistry and Physics*, 20, 14077-14090, 10.5194/acp-20-14077-2020, 2020.

215
